# Supplementary material for: Development-specific transcriptomic profiling suggests new mechanisms for anoxic survival in the ventricle of overwintering turtles
Source: Oxford University Press journal article supplement (doi:10.1242/jeb.213918), 2019-01-01
Supplement: jeb213918supp.pdf [file jeb213918supp.pdf]

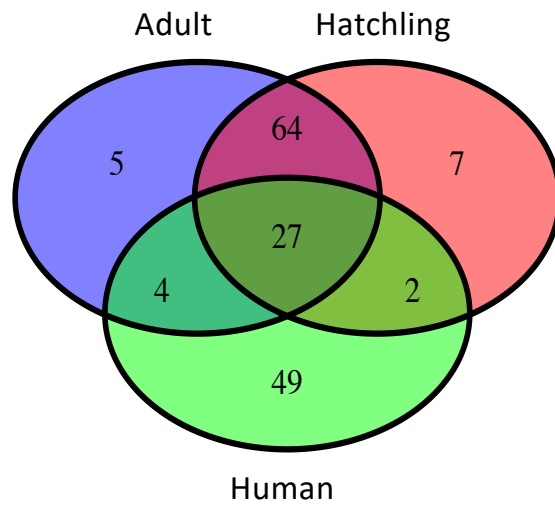

Figure S1: Abundantly expressed gene-coding transcripts in ventricular tissue from painted turtles and humans revealed 33 genes abundantly expressed in both species (Melé et al. 2015).

Table S1: GPS Coordinates for Turtle Populations

| Location                          | Development Stage  | Longitude  | Latitude    |
|-----------------------------------|--------------------|------------|-------------|
| Hideaway Harbor                   | Adults             | 38.937577  | -90.369511  |
| Stump Lake                        | Adults             | 38.982345  | -90.550644  |
| Teal Pond                         | Adults             | 38.873201  | -90.197641  |
| Arlington Drive                   | Adults, Hatchlings | 38.705573  | -90.050483  |
| Lincoln Sheilds Recreational Area | Adults, Hatchlings | 38.877174  | -90.194825  |
| Tucker Pond                       | Adults, Hatchlings | 38.939815  | -90.291639  |
| Biehle                            | Hatchlings         | 37.6302949 | -89.8710887 |

Table S2: Most Abundantly Expressed Transcripts in Adults and Hatchling

| Gene                   | Classification           | Development Stage | Control Mean $\pm$ SEM | Anoxia Mean $\pm$ SEM | Recovery Mean $\pm$ SEM | Rank |
|------------------------|--------------------------|-------------------|------------------------|-----------------------|-------------------------|------|
| ACTA1                  | Contractile Apparatus    | Adult             | 984.74 $\pm$ 232.61    | 1079.62 $\pm$ 374.40  | 1362.03 $\pm$ 260.24    | 85   |
|                        |                          | Hatchling         | 2144.04 $\pm$ 387.05   | 2152.79 $\pm$ 820.61  | 1463.62 $\pm$ 299.45    | 63   |
| ACTB                   | Contractile Apparatus    | Adult             | 875.34 $\pm$ 83.92     | 943.53 $\pm$ 81.57    | 1170.52 $\pm$ 80.58     | 99   |
|                        |                          | Hatchling         | 1175.23 $\pm$ 99.73    | 1192.73 $\pm$ 80.34   | 1355.48 $\pm$ 104.68    | 99   |
| ACTG1                  | Contractile Apparatus    | Adult             | 903.87 $\pm$ 34.13     | 732.94 $\pm$ 69.09    | 849.05 $\pm$ 114.04     | 116  |
|                        |                          | Hatchling         | 1525.19 $\pm$ 21.42    | 1573.56 $\pm$ 82.69   | 1469.86 $\pm$ 84.49     | 82   |
| ACTN2,<br>LOC103306205 | Contractile Apparatus    | Adult             | 901.76 $\pm$ 116.42    | 1110.24 $\pm$ 130.93  | 1136.01 $\pm$ 91.84     | 96   |
|                        |                          | Hatchling         | 1480.32 $\pm$ 96.30    | 1493.19 $\pm$ 131.43  | 1192.74 $\pm$ 65.09     | 90   |
| ADIPOQ                 | signaling                | Adult             | 1172.25 $\pm$ 107.20   | 829.41 $\pm$ 171.12   | 993.64 $\pm$ 100.05     | 98   |
|                        |                          | Hatchling         | 1058.74 $\pm$ 78.17    | 886.02 $\pm$ 95.10    | 675.75 $\pm$ 94.96      | 117  |
| ATF4                   | Transcription Factor     | Adult             | 946.97 $\pm$ 92.18     | 982.27 $\pm$ 38.94    | 1021.36 $\pm$ 92.35     | 101  |
|                        |                          | Hatchling         | 1379.59 $\pm$ 91.69    | 1456.46 $\pm$ 48.66   | 1591.89 $\pm$ 88.90     | 84   |
| CRIP1                  | DNA Binding              | Adult             | 1654.80 $\pm$ 118.35   | 1820.04 $\pm$ 327.69  | 1949.60 $\pm$ 383.86    | 49   |
|                        |                          | Hatchling         | 1532.44 $\pm$ 100.41   | 1235.31 $\pm$ 88.96   | 1023.24 $\pm$ 116.30    | 98   |
| DES                    | Contractile Apparatus    | Adult             | 1310.93 $\pm$ 195.29   | 1418.71 $\pm$ 208.76  | 1610.79 $\pm$ 185.12    | 75   |
|                        |                          | Hatchling         | 1740.31 $\pm$ 134.79   | 1821.89 $\pm$ 351.33  | 1476.41 $\pm$ 105.40    | 75   |
| EEF1A1                 | Translational Regulation | Adult             | 1937.27 $\pm$ 98.78    | 1812.13 $\pm$ 147.24  | 1991.08 $\pm$ 93.62     | 43   |
|                        |                          | Hatchling         | 2639.75 $\pm$ 111.35   | 2905.59 $\pm$ 123.56  | 2838.94 $\pm$ 44.26     | 25   |
| EEF1G                  | Translational Regulation | Adult             | 998.68 $\pm$ 78.17     | 859.72 $\pm$ 52.76    | 971.10 $\pm$ 78.53      | 109  |
|                        |                          | Hatchling         | 1203.65 $\pm$ 45.93    | 1321.70 $\pm$ 35.74   | 1268.81 $\pm$ 98.81     | 97   |
| EEF2                   | Translational Regulation | Adult             | 1146.88 $\pm$ 22.67    | 1088.36 $\pm$ 54.19   | 1050.87 $\pm$ 28.81     | 91   |
|                        |                          | Hatchling         | 1522.00 $\pm$ 7.97     | 1670.33 $\pm$ 54.05   | 1481.65 $\pm$ 37.50     | 79   |
| FAU                    | Translational Regulation | Adult             | 1200.90 $\pm$ 118.33   | 1076.95 $\pm$ 17.31   | 1268.50 $\pm$ 119.25    | 82   |
|                        |                          | Hatchling         | 1475.93 $\pm$ 17.12    | 1604.24 $\pm$ 38.00   | 1553.60 $\pm$ 132.55    | 81   |
| FTH1                   | Cytoskeleton             | Adult             | 2623.48 $\pm$ 270.36   | 2568.41 $\pm$ 42.88   | 2652.61 $\pm$ 349.34    | 12   |
|                        |                          | Hatchling         | 2646.79 $\pm$ 195.58   | 3112.60 $\pm$ 128.73  | 2723.89 $\pm$ 236.35    | 23   |
| GAPDH                  | Metabolism               | Adult             | 1044.44 $\pm$ 11.56    | 1106.74 $\pm$ 78.20   | 1017.78 $\pm$ 33.08     | 95   |
|                        |                          | Hatchling         | 1147.98 $\pm$ 43.24    | 1175.59 $\pm$ 90.39   | 1023.81 $\pm$ 112.97    | 107  |
| GNB2L1                 | Protein Turnover         | Adult             | 1065.72 $\pm$ 138.98   | 873.98 $\pm$ 10.15    | 954.94 $\pm$ 59.25      | 106  |
|                        |                          | Hatchling         | 1294.56 $\pm$ 102.30   | 1418.35 $\pm$ 107.51  | 1363.80 $\pm$ 94.23     | 93   |
| HSPB7                  | Heat Shock               | Adult             | 2143.36 $\pm$ 188.60   | 2402.01 $\pm$ 243.81  | 2273.96 $\pm$ 361.05    | 22   |
|                        |                          | Hatchling         | 2811.13 $\pm$ 128.60   | 2646.98 $\pm$ 110.06  | 2267.73 $\pm$ 80.51     | 32   |
| LDHB                   | Metabolism               | Adult             | 1247.34 $\pm$ 60.07    | 1392.34 $\pm$ 88.64   | 1404.50 $\pm$ 91.60     | 79   |
|                        |                          | Hatchling         | 1441.83 $\pm$ 80.48    | 1352.91 $\pm$ 113.96  | 1045.39 $\pm$ 75.65     | 96   |

| Gene         | Classification           | Development Stage | Control Mean $\pm$ SEM | Anoxia Mean $\pm$ SEM | Recovery Mean $\pm$ SEM | Rank |
|--------------|--------------------------|-------------------|------------------------|-----------------------|-------------------------|------|
| LOC101931353 | Translational Regulation | Adult             | 1958.53 $\pm$ 218.68   | 1890.14 $\pm$ 189.51  | 1961.87 $\pm$ 91.24     | 41   |
| RPL36A       |                          | Hatchling         | 2601.00 $\pm$ 62.54    | 2723.95 $\pm$ 306.10  | 2820.87 $\pm$ 238.06    | 28   |
| LOC101932957 | Translational Regulation | Adult             | 1115.38 $\pm$ 76.11    | 1102.66 $\pm$ 34.18   | 1201.33 $\pm$ 55.63     | 87   |
| RPS4         |                          | Hatchling         | 1383.48 $\pm$ 40.40    | 1513.68 $\pm$ 32.66   | 1408.27 $\pm$ 42.58     | 87   |
| LOC101935401 | Oxygen Transport         | Adult             | 602.61 $\pm$ 137.23    | 381.69 $\pm$ 101.12   | 428.41 $\pm$ 94.71      | 177  |
| HBA          |                          | Hatchling         | 764.21 $\pm$ 184.15    | 2132.55 $\pm$ 425.10  | 1806.81 $\pm$ 294.54    | 78   |
| LOC101939003 | Cytoskeleton             | Adult             | 2176.23 $\pm$ 379.38   | 1124.98 $\pm$ 299.78  | 1471.82 $\pm$ 188.16    | 64   |
| FTL-like     |                          | Hatchling         | 2224.20 $\pm$ 537.17   | 1973.44 $\pm$ 172.84  | 1836.76 $\pm$ 712.20    | 60   |
| LOC101939634 | Signaling                | Adult             | 2184.56 $\pm$ 464.77   | 1922.89 $\pm$ 351.80  | 1713.20 $\pm$ 155.89    | 40   |
| CXCL8-like   |                          | Hatchling         | 1431.57 $\pm$ 105.49   | 1231.48 $\pm$ 328.57  | 1463.78 $\pm$ 200.54    | 91   |
| LOC101942276 | Cytoskeleton             | Adult             | 1501.65 $\pm$ 283.64   | 1761.94 $\pm$ 378.62  | 2750.23 $\pm$ 476.71    | 35   |
| FTH-like     |                          | Hatchling         | 1374.29 $\pm$ 206.15   | 1883.13 $\pm$ 420.30  | 1596.11 $\pm$ 80.89     | 77   |
| LOC101944357 | Translational Regulation | Adult             | 2051.53 $\pm$ 75.50    | 1946.62 $\pm$ 119.16  | 2213.82 $\pm$ 89.32     | 29   |
| CRIBP-like   |                          | Hatchling         | 2334.33 $\pm$ 34.68    | 2288.53 $\pm$ 56.18   | 2109.26 $\pm$ 99.91     | 47   |
| LOC101945004 | Hormone Homeostasis      | Adult             | 4575.76 $\pm$ 1359.36  | 2465.91 $\pm$ 674.21  | 5059.27 $\pm$ 569.98    | 5    |
| - NPPA-like  |                          | Hatchling         | 7531.70 $\pm$ 602.88   | 8909.36 $\pm$ 1738.91 | 4000.03 $\pm$ 754.74    | 2    |
| LOC101950541 | Metabolism               | Adult             | 1279.36 $\pm$ 94.50    | 1389.28 $\pm$ 91.78   | 1202.75 $\pm$ 109.99    | 80   |
| NME          |                          | Hatchling         | 1434.24 $\pm$ 115.69   | 1413.42 $\pm$ 43.21   | 1367.73 $\pm$ 106.73    | 88   |
| LOC101950562 | Translational Regulation | Adult             | 966.88 $\pm$ 140.84    | 907.36 $\pm$ 123.74   | 1073.18 $\pm$ 61.26     | 102  |
| RPL10A       |                          | Hatchling         | 1264.05 $\pm$ 92.23    | 1353.66 $\pm$ 65.52   | 1270.12 $\pm$ 100.86    | 95   |
| LOC101951135 | Translational Regulation | Adult             | 1583.93 $\pm$ 97.05    | 1392.38 $\pm$ 71.50   | 1810.28 $\pm$ 133.53    | 62   |
| RPL27A       |                          | Hatchling         | 2121.24 $\pm$ 60.44    | 2285.08 $\pm$ 99.74   | 2222.44 $\pm$ 97.39     | 50   |
| LOC101951507 | Translational Regulation | Adult             | 3959.26 $\pm$ 989.31   | 4217.45 $\pm$ 609.51  | 4943.54 $\pm$ 908.40    | 4    |
| RPL21        |                          | Hatchling         | 6025.94 $\pm$ 785.40   | 6980.65 $\pm$ 370.55  | 5508.43 $\pm$ 932.51    | 3    |
| LOC101953401 | Oxygen Transport         | Adult             | 1124.02 $\pm$ 290.52   | 710.12 $\pm$ 253.36   | 833.93 $\pm$ 232.40     | 114  |
| HBB          |                          | Hatchling         | 767.51 $\pm$ 247.70    | 2067.65 $\pm$ 592.31  | 1494.93 $\pm$ 370.84    | 86   |
| LOC103305994 | Anti-oxidant             | Adult             | 4629.61 $\pm$ 840.04   | 6907.55 $\pm$ 1139.74 | 8137.12 $\pm$ 1613.46   | 1    |
| MT-like      |                          | Hatchling         | 6433.95 $\pm$ 877.02   | 8347.76 $\pm$ 2685.23 | 10412.37 $\pm$ 2352.01  | 1    |
| MB           | Oxygen Transport         | Adult             | 1425.90 $\pm$ 153.78   | 2031.42 $\pm$ 629.26  | 1440.69 $\pm$ 480.99    | 60   |
|              |                          | Hatchling         | 949.96 $\pm$ 219.71    | 784.45 $\pm$ 148.00   | 720.12 $\pm$ 188.42     | 121  |
| MYH15        | Contractile Apparatus    | Adult             | 1461.36 $\pm$ 171.53   | 2043.16 $\pm$ 378.53  | 2255.45 $\pm$ 385.38    | 42   |
|              |                          | Hatchling         | 2226.55 $\pm$ 379.68   | 1801.72 $\pm$ 296.21  | 1309.50 $\pm$ 47.66     | 70   |
| MYL10        | Contractile Apparatus    | Adult             | 1646.88 $\pm$ 189.76   | 2019.96 $\pm$ 294.40  | 2458.90 $\pm$ 153.98    | 30   |
|              |                          | Hatchling         | 2084.94 $\pm$ 111.60   | 1984.53 $\pm$ 370.87  | 1628.91 $\pm$ 90.27     | 64   |

| Gene   | Classification           | Development Stage | Control Mean $\pm$ SEM | Anoxia Mean $\pm$ SEM | Recovery Mean $\pm$ SEM | Rank |
|--------|--------------------------|-------------------|------------------------|-----------------------|-------------------------|------|
| MYL3   | Contractile Apparatus    | Adult             | 4230.15 $\pm$ 232.35   | 5398.13 $\pm$ 242.08  | 5328.38 $\pm$ 325.77    | 3    |
|        |                          | Hatchling         | 6332.95 $\pm$ 434.35   | 6033.83 $\pm$ 710.50  | 5403.91 $\pm$ 77.64     | 4    |
| MYL7   | Contractile Apparatus    | Adult             | 3958.10 $\pm$ 743.83   | 6167.71 $\pm$ 1596.50 | 5763.25 $\pm$ 1786.90   | 2    |
|        |                          | Hatchling         | 4606.37 $\pm$ 724.98   | 5615.17 $\pm$ 447.92  | 3913.02 $\pm$ 640.91    | 6    |
| NDUFA4 | Metabolism               | Adult             | 1506.71 $\pm$ 256.59   | 1962.01 $\pm$ 384.21  | 1681.58 $\pm$ 415.21    | 54   |
|        |                          | Hatchling         | 982.17 $\pm$ 103.80    | 1042.56 $\pm$ 76.63   | 800.99 $\pm$ 103.52     | 115  |
| OAZ1   | Other                    | Adult             | 1298.51 $\pm$ 103.39   | 1338.23 $\pm$ 237.03  | 1123.07 $\pm$ 134.98    | 81   |
|        |                          | Hatchling         | 702.88 $\pm$ 33.20     | 829.10 $\pm$ 54.43    | 814.83 $\pm$ 27.59      | 125  |
| PPDPF  | unknown                  | Adult             | 1496.65 $\pm$ 82.60    | 1331.54 $\pm$ 143.38  | 1577.49 $\pm$ 86.02     | 73   |
|        |                          | Hatchling         | 1992.43 $\pm$ 74.75    | 2281.93 $\pm$ 293.25  | 2292.51 $\pm$ 223.41    | 53   |
| RPL10  | Translational Regulation | Adult             | 2528.44 $\pm$ 313.45   | 1882.42 $\pm$ 232.50  | 2405.55 $\pm$ 295.16    | 23   |
|        |                          | Hatchling         | 2839.87 $\pm$ 141.26   | 3259.11 $\pm$ 235.56  | 2678.93 $\pm$ 312.49    | 19   |
| RPL11  | Translational Regulation | Adult             | 1410.72 $\pm$ 121.55   | 1244.19 $\pm$ 53.79   | 1587.66 $\pm$ 126.40    | 77   |
|        |                          | Hatchling         | 1770.81 $\pm$ 87.02    | 1979.02 $\pm$ 120.58  | 1675.43 $\pm$ 221.77    | 68   |
| RPL13  | Translational Regulation | Adult             | 1975.41 $\pm$ 157.50   | 1714.06 $\pm$ 91.07   | 2152.75 $\pm$ 172.70    | 39   |
|        |                          | Hatchling         | 2461.47 $\pm$ 45.20    | 2724.44 $\pm$ 176.57  | 2321.47 $\pm$ 202.12    | 36   |
| RPL13A | Translational Regulation | Adult             | 1573.47 $\pm$ 146.05   | 1440.73 $\pm$ 54.98   | 1636.91 $\pm$ 109.92    | 68   |
|        |                          | Hatchling         | 2256.78 $\pm$ 154.25   | 2622.36 $\pm$ 58.19   | 2344.10 $\pm$ 192.40    | 39   |
| RPL14  | Translational Regulation | Adult             | 1761.80 $\pm$ 134.40   | 1659.79 $\pm$ 95.74   | 1783.75 $\pm$ 59.41     | 52   |
|        |                          | Hatchling         | 1836.46 $\pm$ 64.11    | 1933.08 $\pm$ 54.11   | 1843.62 $\pm$ 101.52    | 66   |
| RPL15  | Translational Regulation | Adult             | 1181.84 $\pm$ 95.37    | 1028.31 $\pm$ 33.87   | 1206.16 $\pm$ 73.79     | 88   |
|        |                          | Hatchling         | 1887.59 $\pm$ 148.80   | 1992.82 $\pm$ 79.48   | 1697.62 $\pm$ 105.07    | 67   |
| RPL17  | Translational Regulation | Adult             | 2112.93 $\pm$ 148.33   | 2110.87 $\pm$ 94.88   | 2407.02 $\pm$ 207.59    | 26   |
|        |                          | Hatchling         | 3423.09 $\pm$ 137.38   | 3342.71 $\pm$ 147.39  | 3312.66 $\pm$ 186.59    | 9    |
| RPL18  | Translational Regulation | Adult             | 1249.03 $\pm$ 114.40   | 937.26 $\pm$ 117.79   | 1157.49 $\pm$ 27.09     | 89   |
|        |                          | Hatchling         | 1758.17 $\pm$ 133.26   | 1932.80 $\pm$ 154.69  | 1613.01 $\pm$ 185.78    | 72   |
| RPL18A | Translational Regulation | Adult             | 1076.00 $\pm$ 73.37    | 956.63 $\pm$ 36.92    | 1106.22 $\pm$ 99.89     | 97   |
|        |                          | Hatchling         | 1181.90 $\pm$ 31.61    | 1259.50 $\pm$ 35.13   | 1148.88 $\pm$ 61.04     | 102  |
| RPL19  | Translational Regulation | Adult             | 1367.46 $\pm$ 86.78    | 1236.87 $\pm$ 63.97   | 1562.54 $\pm$ 139.97    | 78   |
|        |                          | Hatchling         | 1674.26 $\pm$ 29.18    | 1864.47 $\pm$ 42.35   | 1746.45 $\pm$ 66.97     | 73   |
| RPL21  | Translational Regulation | Adult             | 2669.64 $\pm$ 322.56   | 2549.75 $\pm$ 76.70   | 2934.60 $\pm$ 213.70    | 10   |
|        |                          | Hatchling         | 2952.51 $\pm$ 102.28   | 2953.86 $\pm$ 50.84   | 2737.22 $\pm$ 86.47     | 21   |
| RPL23  | Translational Regulation | Adult             | 1748.69 $\pm$ 149.29   | 1462.01 $\pm$ 59.10   | 1794.16 $\pm$ 228.38    | 59   |
|        |                          | Hatchling         | 2185.80 $\pm$ 188.38   | 2418.13 $\pm$ 99.81   | 2164.95 $\pm$ 251.32    | 46   |

| Gene    | Classification           | Development Stage | Control Mean $\pm$ SEM | Anoxia Mean $\pm$ SEM | Recovery Mean $\pm$ SEM | Rank |
|---------|--------------------------|-------------------|------------------------|-----------------------|-------------------------|------|
| RPL23A  | Translational Regulation | Adult             | 1906.45 $\pm$ 161.33   | 1727.35 $\pm$ 74.92   | 1932.56 $\pm$ 147.59    | 45   |
|         |                          | Hatchling         | 2417.85 $\pm$ 35.61    | 2614.12 $\pm$ 70.66   | 2450.62 $\pm$ 69.81     | 37   |
| RPL24   | Translational Regulation | Adult             | 2041.80 $\pm$ 384.18   | 1751.96 $\pm$ 228.26  | 2068.68 $\pm$ 391.15    | 37   |
|         |                          | Hatchling         | 3177.04 $\pm$ 460.50   | 3452.27 $\pm$ 643.75  | 3411.78 $\pm$ 595.01    | 10   |
| RPL26L1 | Translational Regulation | Adult             | 2532.66 $\pm$ 188.72   | 2284.77 $\pm$ 19.33   | 2558.66 $\pm$ 248.74    | 15   |
|         |                          | Hatchling         | 3187.37 $\pm$ 107.19   | 3502.09 $\pm$ 110.31  | 3056.66 $\pm$ 175.11    | 13   |
| RPL27   | Translational Regulation | Adult             | 2413.40 $\pm$ 249.21   | 2002.44 $\pm$ 173.05  | 2219.12 $\pm$ 217.93    | 25   |
|         |                          | Hatchling         | 2365.77 $\pm$ 112.78   | 2472.68 $\pm$ 91.39   | 2227.18 $\pm$ 273.37    | 43   |
| RPL30   | Translational Regulation | Adult             | 1215.45 $\pm$ 75.79    | 983.43 $\pm$ 4.16     | 1224.30 $\pm$ 125.28    | 86   |
|         |                          | Hatchling         | 1294.44 $\pm$ 26.91    | 1413.13 $\pm$ 67.07   | 1316.67 $\pm$ 84.86     | 94   |
| RPL31   | Translational Regulation | Adult             | 2150.60 $\pm$ 131.63   | 1896.47 $\pm$ 85.46   | 2077.67 $\pm$ 91.98     | 31   |
|         |                          | Hatchling         | 2305.93 $\pm$ 83.36    | 2732.01 $\pm$ 112.65  | 2497.90 $\pm$ 126.71    | 34   |
| RPL32   | Translational Regulation | Adult             | 2574.11 $\pm$ 169.59   | 2464.81 $\pm$ 67.53   | 2758.63 $\pm$ 206.46    | 13   |
|         |                          | Hatchling         | 3282.68 $\pm$ 335.94   | 3250.25 $\pm$ 336.73  | 3432.03 $\pm$ 241.89    | 11   |
| RPL34   | Translational Regulation | Adult             | 1752.82 $\pm$ 107.24   | 1488.13 $\pm$ 50.48   | 1887.59 $\pm$ 154.49    | 56   |
|         |                          | Hatchling         | 2123.82 $\pm$ 82.87    | 2396.81 $\pm$ 111.54  | 2086.93 $\pm$ 144.83    | 51   |
| RPL35   | Translational Regulation | Adult             | 3105.97 $\pm$ 164.76   | 2518.81 $\pm$ 178.80  | 2858.75 $\pm$ 338.07    | 8    |
|         |                          | Hatchling         | 2759.23 $\pm$ 119.94   | 3158.28 $\pm$ 199.02  | 2931.05 $\pm$ 264.78    | 18   |
| RPL35A  | Translational Regulation | Adult             | 2334.55 $\pm$ 176.70   | 2034.08 $\pm$ 68.65   | 2344.33 $\pm$ 123.63    | 24   |
|         |                          | Hatchling         | 2745.69 $\pm$ 58.94    | 2884.68 $\pm$ 61.79   | 2685.85 $\pm$ 139.64    | 27   |
| RPL36   | Translational Regulation | Adult             | 1904.01 $\pm$ 154.78   | 1548.28 $\pm$ 106.54  | 1991.26 $\pm$ 170.72    | 47   |
|         |                          | Hatchling         | 2294.54 $\pm$ 93.32    | 2663.85 $\pm$ 133.74  | 2232.70 $\pm$ 165.58    | 40   |
| RPL37A  | Translational Regulation | Adult             | 2017.55 $\pm$ 202.50   | 1722.62 $\pm$ 312.60  | 2104.38 $\pm$ 236.62    | 38   |
|         |                          | Hatchling         | 2351.92 $\pm$ 120.19   | 2703.44 $\pm$ 257.40  | 2697.08 $\pm$ 445.92    | 31   |
| RPL38   | Translational Regulation | Adult             | 2715.96 $\pm$ 332.92   | 2500.44 $\pm$ 148.41  | 2949.99 $\pm$ 249.38    | 9    |
|         |                          | Hatchling         | 3484.05 $\pm$ 146.86   | 3328.97 $\pm$ 189.37  | 2990.37 $\pm$ 223.61    | 12   |
| RPL39   | Translational Regulation | Adult             | 1052.16 $\pm$ 63.43    | 975.36 $\pm$ 36.77    | 941.73 $\pm$ 55.77      | 100  |
|         |                          | Hatchling         | 1070.77 $\pm$ 85.25    | 1229.00 $\pm$ 50.27   | 1123.03 $\pm$ 22.50     | 106  |
| RPL4    | Translational Regulation | Adult             | 1450.34 $\pm$ 85.33    | 1344.98 $\pm$ 47.02   | 1547.10 $\pm$ 146.15    | 74   |
|         |                          | Hatchling         | 2024.48 $\pm$ 37.67    | 2272.26 $\pm$ 94.47   | 2037.76 $\pm$ 126.99    | 57   |
| RPL5    | Translational Regulation | Adult             | 1945.50 $\pm$ 135.36   | 1721.98 $\pm$ 119.46  | 1975.21 $\pm$ 173.82    | 44   |
|         |                          | Hatchling         | 2193.05 $\pm$ 84.78    | 2323.59 $\pm$ 77.41   | 2261.00 $\pm$ 88.19     | 45   |
| RPL6    | Translational Regulation | Adult             | 1516.40 $\pm$ 126.28   | 1350.55 $\pm$ 131.01  | 1645.84 $\pm$ 118.85    | 71   |
|         |                          | Hatchling         | 1848.07 $\pm$ 89.49    | 2039.18 $\pm$ 49.62   | 1905.42 $\pm$ 85.34     | 62   |

| Gene   | Classification           | Development Stage | Control Mean $\pm$ SEM | Anoxia Mean $\pm$ SEM | Recovery Mean $\pm$ SEM | Rank |
|--------|--------------------------|-------------------|------------------------|-----------------------|-------------------------|------|
| RPL7   | Translational Regulation | Adult             | 1560.18 $\pm$ 79.97    | 1419.45 $\pm$ 73.70   | 1709.56 $\pm$ 160.67    | 67   |
|        |                          | Hatchling         | 1931.31 $\pm$ 85.33    | 1991.76 $\pm$ 88.57   | 1974.01 $\pm$ 143.44    | 61   |
| RPL7A  | Translational Regulation | Adult             | 1776.14 $\pm$ 83.25    | 1597.70 $\pm$ 96.65   | 1779.14 $\pm$ 59.32     | 53   |
|        |                          | Hatchling         | 2160.68 $\pm$ 25.16    | 2215.35 $\pm$ 25.75   | 2201.03 $\pm$ 137.03    | 52   |
| RPL8   | Translational Regulation | Adult             | 1163.88 $\pm$ 74.90    | 1096.62 $\pm$ 42.19   | 1280.81 $\pm$ 73.44     | 83   |
|        |                          | Hatchling         | 1436.49 $\pm$ 20.52    | 1535.90 $\pm$ 59.64   | 1486.08 $\pm$ 134.30    | 83   |
| RPL9   | Translational Regulation | Adult             | 1693.72 $\pm$ 114.87   | 1603.81 $\pm$ 71.62   | 1738.38 $\pm$ 24.88     | 58   |
|        |                          | Hatchling         | 2075.04 $\pm$ 121.85   | 2189.81 $\pm$ 130.87  | 1999.18 $\pm$ 127.84    | 58   |
| RPLP0  | Translational Regulation | Adult             | 1441.17 $\pm$ 112.92   | 1392.00 $\pm$ 72.49   | 1600.06 $\pm$ 79.29     | 72   |
|        |                          | Hatchling         | 2326.46 $\pm$ 113.54   | 2589.28 $\pm$ 88.18   | 2375.35 $\pm$ 123.89    | 38   |
| RPLP1  | Translational Regulation | Adult             | 1497.65 $\pm$ 67.78    | 1509.23 $\pm$ 79.02   | 1683.66 $\pm$ 131.02    | 66   |
|        |                          | Hatchling         | 1876.59 $\pm$ 116.11   | 1992.55 $\pm$ 102.51  | 1819.72 $\pm$ 232.01    | 65   |
| RPS10  | Translational Regulation | Adult             | 1842.98 $\pm$ 148.12   | 1624.31 $\pm$ 66.55   | 1965.59 $\pm$ 205.63    | 48   |
|        |                          | Hatchling         | 2341.05 $\pm$ 55.89    | 2589.95 $\pm$ 85.20   | 2235.76 $\pm$ 176.56    | 41   |
| RPS11  | Translational Regulation | Adult             | 1751.87 $\pm$ 193.33   | 1370.57 $\pm$ 206.56  | 2014.98 $\pm$ 148.16    | 55   |
|        |                          | Hatchling         | 2319.05 $\pm$ 151.23   | 2593.95 $\pm$ 83.46   | 2626.37 $\pm$ 190.24    | 33   |
| RPS12  | Translational Regulation | Adult             | 2427.25 $\pm$ 179.15   | 2104.83 $\pm$ 140.05  | 2415.75 $\pm$ 179.02    | 19   |
|        |                          | Hatchling         | 2916.43 $\pm$ 51.89    | 3289.23 $\pm$ 133.83  | 2926.28 $\pm$ 96.15     | 15   |
| RPS13  | Translational Regulation | Adult             | 2142.19 $\pm$ 187.27   | 1892.64 $\pm$ 89.73   | 2247.03 $\pm$ 189.46    | 28   |
|        |                          | Hatchling         | 2743.07 $\pm$ 26.80    | 3022.74 $\pm$ 102.85  | 2662.71 $\pm$ 84.49     | 24   |
| RPS14  | Translational Regulation | Adult             | 2231.13 $\pm$ 244.26   | 1862.05 $\pm$ 54.84   | 2194.15 $\pm$ 248.18    | 27   |
|        |                          | Hatchling         | 2542.29 $\pm$ 59.03    | 2548.85 $\pm$ 133.37  | 2439.13 $\pm$ 191.74    | 35   |
| RPS15A | Translational Regulation | Adult             | 2407.60 $\pm$ 163.50   | 2040.89 $\pm$ 126.44  | 2438.80 $\pm$ 215.24    | 21   |
|        |                          | Hatchling         | 2630.65 $\pm$ 140.01   | 2690.86 $\pm$ 76.10   | 2690.32 $\pm$ 240.35    | 30   |
| RPS16  | Translational Regulation | Adult             | 2397.84 $\pm$ 108.64   | 2101.65 $\pm$ 101.84  | 2396.84 $\pm$ 243.88    | 20   |
|        |                          | Hatchling         | 2761.92 $\pm$ 84.14    | 2845.06 $\pm$ 285.01  | 2767.22 $\pm$ 313.78    | 26   |
| RPS17  | Translational Regulation | Adult             | 2692.24 $\pm$ 180.74   | 2356.02 $\pm$ 133.95  | 2739.27 $\pm$ 172.29    | 14   |
|        |                          | Hatchling         | 2786.03 $\pm$ 88.02    | 3174.74 $\pm$ 169.44  | 2895.90 $\pm$ 228.68    | 17   |
| RPS18  | Translational Regulation | Adult             | 1910.89 $\pm$ 263.26   | 1351.73 $\pm$ 90.65   | 1966.56 $\pm$ 315.04    | 51   |
|        |                          | Hatchling         | 2064.16 $\pm$ 106.45   | 2258.05 $\pm$ 261.30  | 2043.85 $\pm$ 97.66     | 56   |
| RPS19  | Translational Regulation | Adult             | 2174.99 $\pm$ 237.45   | 1725.67 $\pm$ 99.46   | 2106.07 $\pm$ 197.04    | 36   |
|        |                          | Hatchling         | 2549.26 $\pm$ 76.38    | 2753.54 $\pm$ 170.01  | 2761.06 $\pm$ 123.15    | 29   |
| RPS2   | Translational Regulation | Adult             | 2156.70 $\pm$ 47.51    | 1774.54 $\pm$ 114.83  | 2096.12 $\pm$ 164.28    | 34   |
|        |                          | Hatchling         | 2236.04 $\pm$ 88.82    | 2536.89 $\pm$ 196.02  | 2160.16 $\pm$ 232.10    | 44   |

| Gene    | Classification           | Development Stage | Control Mean $\pm$ SEM | Anoxia Mean $\pm$ SEM | Recovery Mean $\pm$ SEM | Rank |
|---------|--------------------------|-------------------|------------------------|-----------------------|-------------------------|------|
| RPS20   | Translational Regulation | Adult             | 2010.08 $\pm$ 146.74   | 1509.68 $\pm$ 93.34   | 1931.26 $\pm$ 217.30    | 46   |
|         |                          | Hatchling         | 2831.86 $\pm$ 61.31    | 3359.29 $\pm$ 313.47  | 3061.99 $\pm$ 221.25    | 14   |
| RPS21   | Translational Regulation | Adult             | 1625.64 $\pm$ 72.32    | 1441.78 $\pm$ 95.61   | 1707.20 $\pm$ 181.31    | 63   |
|         |                          | Hatchling         | 1933.03 $\pm$ 101.94   | 1635.21 $\pm$ 85.17   | 1824.07 $\pm$ 16.37     | 69   |
| RPS24   | Translational Regulation | Adult             | 2500.33 $\pm$ 179.32   | 2281.73 $\pm$ 147.67  | 2455.94 $\pm$ 190.96    | 17   |
|         |                          | Hatchling         | 2919.48 $\pm$ 103.47   | 3179.90 $\pm$ 134.62  | 2847.88 $\pm$ 183.02    | 16   |
| RPS25   | Translational Regulation | Adult             | 2033.46 $\pm$ 120.27   | 1843.09 $\pm$ 85.80   | 2151.90 $\pm$ 183.52    | 33   |
|         |                          | Hatchling         | 2771.42 $\pm$ 193.24   | 2928.82 $\pm$ 89.33   | 2962.75 $\pm$ 83.56     | 20   |
| RPS26   | Translational Regulation | Adult             | 1143.74 $\pm$ 129.28   | 985.63 $\pm$ 114.15   | 1325.97 $\pm$ 140.87    | 84   |
|         |                          | Hatchling         | 1811.05 $\pm$ 224.86   | 1926.47 $\pm$ 158.70  | 1572.88 $\pm$ 233.74    | 71   |
| RPS27   | Translational Regulation | Adult             | 2641.24 $\pm$ 211.41   | 2402.76 $\pm$ 136.16  | 2822.45 $\pm$ 182.18    | 11   |
|         |                          | Hatchling         | 3315.15 $\pm$ 71.42    | 3508.33 $\pm$ 158.43  | 3431.71 $\pm$ 124.07    | 8    |
| RPS27A  | Translational Regulation | Adult             | 1609.58 $\pm$ 94.38    | 1607.48 $\pm$ 55.19   | 1838.17 $\pm$ 74.13     | 57   |
|         |                          | Hatchling         | 2070.24 $\pm$ 81.87    | 2340.75 $\pm$ 57.05   | 2078.52 $\pm$ 92.79     | 55   |
| RPS29   | Translational Regulation | Adult             | 4150.14 $\pm$ 441.78   | 3447.31 $\pm$ 339.43  | 4228.36 $\pm$ 428.06    | 6    |
|         |                          | Hatchling         | 4966.86 $\pm$ 462.33   | 5287.85 $\pm$ 325.60  | 4668.06 $\pm$ 362.54    | 5    |
| RPS3    | Translational Regulation | Adult             | 1582.81 $\pm$ 188.92   | 1382.63 $\pm$ 67.16   | 1623.36 $\pm$ 93.55     | 70   |
|         |                          | Hatchling         | 1697.11 $\pm$ 133.95   | 1753.43 $\pm$ 39.53   | 1644.66 $\pm$ 108.75    | 74   |
| RPS3A   | Translational Regulation | Adult             | 2332.33 $\pm$ 177.97   | 2234.64 $\pm$ 95.54   | 2456.61 $\pm$ 67.03     | 18   |
|         |                          | Hatchling         | 2855.31 $\pm$ 99.03    | 2838.84 $\pm$ 113.46  | 2909.10 $\pm$ 159.20    | 22   |
| RPS6    | Translational Regulation | Adult             | 1928.34 $\pm$ 157.28   | 1920.12 $\pm$ 82.85   | 2193.77 $\pm$ 155.57    | 32   |
|         |                          | Hatchling         | 2307.10 $\pm$ 69.21    | 2429.97 $\pm$ 45.27   | 2396.89 $\pm$ 197.83    | 42   |
| RPS7    | Translational Regulation | Adult             | 1439.97 $\pm$ 62.29    | 1322.05 $\pm$ 45.58   | 1505.47 $\pm$ 94.80     | 76   |
|         |                          | Hatchling         | 1625.08 $\pm$ 16.52    | 1680.73 $\pm$ 41.95   | 1557.13 $\pm$ 123.03    | 76   |
| RPS8    | Translational Regulation | Adult             | 1822.24 $\pm$ 129.89   | 1590.65 $\pm$ 70.81   | 1894.52 $\pm$ 205.84    | 50   |
|         |                          | Hatchling         | 2224.95 $\pm$ 107.51   | 2212.75 $\pm$ 213.68  | 2239.23 $\pm$ 93.03     | 48   |
| RPSA    | Translational Regulation | Adult             | 1172.34 $\pm$ 27.95    | 959.95 $\pm$ 120.06   | 1120.11 $\pm$ 79.71     | 93   |
|         |                          | Hatchling         | 1231.53 $\pm$ 62.23    | 1321.47 $\pm$ 61.32   | 1094.03 $\pm$ 102.35    | 100  |
| S100A6  | Ca2+ Binding             | Adult             | 1096.88 $\pm$ 125.39   | 1037.82 $\pm$ 142.21  | 1138.06 $\pm$ 120.08    | 92   |
|         |                          | Hatchling         | 1255.85 $\pm$ 159.13   | 1457.96 $\pm$ 101.80  | 1364.61 $\pm$ 156.43    | 92   |
| SLC25A4 | Metabolism               | Adult             | 2168.25 $\pm$ 314.86   | 2434.84 $\pm$ 357.27  | 2712.23 $\pm$ 172.86    | 16   |
|         |                          | Hatchling         | 2180.90 $\pm$ 226.86   | 2026.99 $\pm$ 97.62   | 1998.28 $\pm$ 120.69    | 59   |
| TNNI3   | Contractile Apparatus    | Adult             | 770.37 $\pm$ 67.47     | 871.39 $\pm$ 93.85    | 993.79 $\pm$ 103.94     | 115  |
|         |                          | Hatchling         | 1565.38 $\pm$ 99.12    | 1704.56 $\pm$ 128.14  | 1376.55 $\pm$ 149.79    | 80   |



| Gene  | Classification           | Development Stage | Control Mean $\pm$ SEM | Anoxia Mean $\pm$ SEM | Recovery Mean $\pm$ SEM | Rank |
|-------|--------------------------|-------------------|------------------------|-----------------------|-------------------------|------|
| TNNT2 | Contractile Apparatus    | Adult             | 904.41 $\pm$ 37.68     | 1051.46 $\pm$ 148.74  | 1253.98 $\pm$ 115.51    | 94   |
|       |                          | Hatchling         | 1396.05 $\pm$ 129.89   | 1430.10 $\pm$ 292.17  | 1354.04 $\pm$ 154.80    | 89   |
| TPM1  | Contractile Apparatus    | Adult             | 795.33 $\pm$ 87.13     | 1007.31 $\pm$ 140.75  | 972.89 $\pm$ 95.78      | 112  |
|       |                          | Hatchling         | 1536.50 $\pm$ 173.20   | 1500.20 $\pm$ 248.08  | 1387.91 $\pm$ 159.46    | 85   |
| TPM4  | Contractile Apparatus    | Adult             | 1308.45 $\pm$ 171.67   | 1764.11 $\pm$ 241.90  | 1781.58 $\pm$ 192.19    | 61   |
|       |                          | Hatchling         | 2373.39 $\pm$ 244.26   | 2389.36 $\pm$ 514.18  | 1758.88 $\pm$ 214.28    | 54   |
| TPT1  | Development              | Adult             | 3149.86 $\pm$ 225.27   | 2931.09 $\pm$ 187.29  | 3120.01 $\pm$ 122.26    | 7    |
|       |                          | Hatchling         | 3828.00 $\pm$ 145.74   | 4195.12 $\pm$ 175.64  | 4164.83 $\pm$ 160.06    | 7    |
| UBA52 | Translational Regulation | Adult             | 1781.76 $\pm$ 145.60   | 1234.39 $\pm$ 94.74   | 1729.84 $\pm$ 182.98    | 65   |
|       |                          | Hatchling         | 2205.94 $\pm$ 328.54   | 2456.68 $\pm$ 468.26  | 1993.21 $\pm$ 207.59    | 49   |
| UBB   | Protein Turnover         | Adult             | 1657.39 $\pm$ 84.06    | 1309.10 $\pm$ 146.52  | 1677.50 $\pm$ 236.32    | 69   |
|       |                          | Hatchling         | 824.76 $\pm$ 40.78     | 736.77 $\pm$ 82.66    | 731.03 $\pm$ 73.04      | 130  |
| UBC   | Protein Turnover         | Adult             | 1084.75 $\pm$ 130.90   | 1077.12 $\pm$ 80.94   | 1170.42 $\pm$ 88.01     | 90   |
|       |                          | Hatchling         | 1104.41 $\pm$ 30.70    | 1355.10 $\pm$ 137.68  | 1111.30 $\pm$ 87.82     | 103  |

Table S3: Ranks of the Highest Expressed Gene-coding Nuclear Transcripts in the Heart

| Gene                     | Human Rank | Adult Turtle Rank | Hatchling Turtle Rank |
|--------------------------|------------|-------------------|-----------------------|
| MYL2                     | 1          | 10992             | 778                   |
| DES                      | 2          | 75                | 75                    |
| NPPA-like - LOC101945004 | 3          | 5                 | 2                     |
| TNNI3                    | 4          | 115               | 80                    |
| MYH7                     | 5          | 11026             | 9507                  |
| ACTC1                    | 6          | 564               | 337                   |
| ACTA1                    | 7          | 85                | 63                    |
| TCAP                     | 8          | 143               | 762                   |
| MYL3                     | 9          | 3                 | 4                     |
| TNNC1                    | 10         | 113               | 122                   |
| CKM                      | 11         | 231               | 296                   |
| MB                       | 12         | 60                | 121                   |
| TNNT2                    | 13         | 94                | 89                    |
| ANKRD1                   | 14         | 5676              | 4887                  |
| FABP3 (FABP heart-like)  | 15         | 2243              | 2661                  |
| CRYAB                    | 16         | 329               | 1152                  |
| GAPDH                    | 17         | 95                | 107                   |
| MYH6                     | 18         | 10012             | 590                   |
| MYL7                     | 19         | 2                 | 6                     |
| HSPB7                    | 20         | 22                | 32                    |
| SLC25A4                  | 21         | 16                | 59                    |
| MYL9                     | 22         | 118               | 116                   |
| TPM1                     | 23         | 112               | 85                    |
| ATP5B                    | 24         | 139               | 187                   |
| MYBPC3                   | 25         | 185               | 243                   |
| MYL12A - LOC101936202    | 26         | 223               | 227                   |
| TPT1                     | 27         | 7                 | 7                     |
| NPPB- LOC101944735       | 28         | 330               | 5250                  |
| COX6A2                   | 29         | -                 | -                     |
| FTL - LOC101942276       | 30         | 35                | 77                    |
| FTL - LOC101939003       | 30         | 64                | 60                    |
| PTGDS (HPGDS)            | 31         | -                 | -                     |
| HSPB1                    | 32         | 134               | 136                   |
| CSRP3                    | 33         | 126               | 202                   |
| PLN                      | 34         | 108               | 148                   |
| RPLP1                    | 35         | 66                | 65                    |
| LDHB                     | 36         | 79                | 96                    |
| RPS11                    | 37         | 55                | 33                    |
| FTH1                     | 38         | 12                | 23                    |
| ATP5A1                   | 39         | 162               | 203                   |
| HSPB6                    | 40         | 122               | 191                   |
| NDUFA1                   | 41         | 348               | 436                   |
| RPL19                    | 42         | 78                | 73                    |

| Gene                 | Human Rank | Adult Turtle Rank | Hatchling Turtle Rank |
|----------------------|------------|-------------------|-----------------------|
| EEF2                 | 43         | 91                | 79                    |
| EEF1A2               | 44         | 364               | 278                   |
| ALDOA                | 45         | 138               | 165                   |
| ITGB1BP3 (NMRK2)     | 46         | 853               | 1161                  |
| RPS18                | 47         | 51                | 56                    |
| GPX3                 | 48         | 309               | 277                   |
| RPL26 (RPL26L1)      | 49         | 15                | 13                    |
| ACTB                 | 50         | 99                | 99                    |
| RPL27                | 51         | 25                | 43                    |
| ATP5E                | 52         | 174               | 181                   |
| RPS12                | 53         | 19                | 15                    |
| ACTN2 - LOC103306205 | 54         | 96                | 90                    |
| ACADVL               | 55         | 411               | 235                   |
| CKMT2                | 56         | 279               | 473                   |
| NDUFS5               | 57         | 396               | 512                   |
| HSP90AB1             | 58         | 133               | 128                   |
| UBB                  | 59         | 69                | 130                   |
| RPLP2                | 60         | 123               | 111                   |
| MYL4                 | 61         | 9924              | 177                   |
| SEPW1                | 62         | -                 | -                     |
| RPL8                 | 63         | 83                | 83                    |
| PSAP                 | 64         | -                 | -                     |
| RPS16                | 65         | 20                | 26                    |
| COX6B1               | 66         | -                 | -                     |
| RPS27A               | 67         | 57                | 55                    |
| COX8A                | 68         | -                 | -                     |
| ATP5H                | 69         | 200               | 242                   |
| BSG                  | 70         | 178               | 157                   |
| SLC25A3              | 71         | 182               | 220                   |
| COX7A1               | 72         | -                 | -                     |
| RPL10                | 73         | 23                | 19                    |
| MYOZ2                | 74         | 171               | 231                   |
| OAZ1                 | 75         | 81                | 125                   |
| MDH1                 | 76         | 205               | 265                   |
| FLNC                 | 77         | 729               | 574                   |
| AC008038.1 (SRSF2)   | 78         | 678               | 702                   |
| CASQ2                | 79         | 164               | 185                   |
| TGM2                 | 80         | 811               | 1231                  |
| ATP5J                | 81         | 703               | 872                   |

In human, ranks were determined by cumulative expression values for 81 nuclear gene-coding transcripts from the human heart (Melé et al 2015). In the hatchling and adult turtle, ranks were determined by cumulative FPKM values across treatment for 11,072 genes. Genes highlighted in green are found also highly expressed (top 100) in adult and hatchling turtles (N=33)

Table S4: Potential Protective Genes During Anoxia and Recovery

| Gene        | Classification                                   | Development | Control Mean $\pm$ SEM FPKM        | Anoxia Mean $\pm$ SEM FPKM            | Recovery Mean $\pm$ SEM FPKM          |
|-------------|--------------------------------------------------|-------------|------------------------------------|---------------------------------------|---------------------------------------|
| ACTA2       | Contractility                                    | Adult       | <b>29.46 <math>\pm</math> 8.67</b> | <b>82.48 <math>\pm</math> 58.63</b>   | <b>62.35 <math>\pm</math> 47.45</b>   |
|             |                                                  | Hatchling   | 5.64 $\pm$ 1.19                    | 9.89 $\pm$ 3.69                       | 11.08 $\pm$ 2.61                      |
| CLCA1-like  | Membrane Transport: Chloride                     | Adult       | <b>2.93 <math>\pm</math> 0.93</b>  | <b>12.20 <math>\pm</math> 6.14</b>    | <b>19.84 <math>\pm</math> 14.19</b>   |
|             |                                                  | Hatchling   | 1.33 $\pm$ 0.71                    | 1.22 $\pm$ 0.53                       | 0.36 $\pm$ 0.24                       |
| ETNPPL      | Phosphoethanolamine Digestion                    | Adult       | <b>7.99 <math>\pm</math> 1.71</b>  | <b>16.44 <math>\pm</math> 4.35</b>    | <b>17.29 <math>\pm</math> 4.70</b>    |
|             |                                                  | Hatchling   | 3.57 $\pm$ 0.79                    | 2.57 $\pm$ 1.32                       | 6.53 $\pm$ 1.31                       |
| PRSS27-like | Post Translational Modification: Serine Protease | Adult       | <b>3.28 <math>\pm</math> 2.23</b>  | <b>36.88 <math>\pm</math> 36.28</b>   | <b>31.23 <math>\pm</math> 29.34</b>   |
|             |                                                  | Hatchling   | 0.38 $\pm$ 0.15                    | 1.28 $\pm$ 0.63                       | 0.81 $\pm$ 0.50                       |
| PRSS27-like | Post Translational Modification: Serine Protease | Adult       | 0.88 $\pm$ 0.39                    | <b>5.54 <math>\pm</math> 4.66</b>     | <b>5.41 <math>\pm</math> 4.57</b>     |
|             |                                                  | Hatchling   | 0.68 $\pm$ 0.16                    | 1.35 $\pm$ 0.34                       | 1.26 $\pm$ 0.51                       |
| S100B       | Calcium Regulation                               | Adult       | 6.45 $\pm$ 2.72                    | <b>32.57 <math>\pm</math> 20.73</b>   | <b>33.45 <math>\pm</math> 20.48</b>   |
|             |                                                  | Hatchling   | 7.79 $\pm$ 4.11                    | 16.95 $\pm$ 8.05                      | 9.79 $\pm$ 4.98                       |
| MLPH        | Binding: Myosin                                  | Adult       | 2.03 $\pm$ 0.58                    | <b>4.32 <math>\pm</math> 1.05</b>     | 4.25 $\pm$ 1.69                       |
|             |                                                  | Hatchling   | 1.28 $\pm$ 0.32                    | 1.91 $\pm$ 0.30                       | 2.52 $\pm$ 0.20                       |
| FGL1-like   | Development: Mitogenic Activity                  | Adult       | 5.14 $\pm$ 1.49                    | <b>13.58 <math>\pm</math> 5.16</b>    | <b>11.05 <math>\pm</math> 1.91</b>    |
|             |                                                  | Hatchling   | 5.10 $\pm$ 0.86                    | 3.03 $\pm$ 0.61                       | 3.37 $\pm$ 0.37                       |
| PPDPFL      | Cell Differentiaton                              | Adult       | <b>3.85 <math>\pm</math> 1.21</b>  | <b>9.68 <math>\pm</math> 2.20</b>     | <b>3.89 <math>\pm</math> 0.45</b>     |
|             |                                                  | Hatchling   | 1.23 $\pm$ 0.29                    | 1.73 $\pm$ 0.30                       | 1.88 $\pm$ 0.22                       |
| BTC         | Growth Factor                                    | Adult       | 1.46 $\pm$ 0.08                    | <b>6.96 <math>\pm</math> 3.80</b>     | <b>5.36 <math>\pm</math> 2.09</b>     |
|             |                                                  | Hatchling   | <b>3.23 <math>\pm</math> 2.47</b>  | 1.96 $\pm$ 1.36                       | 2.63 $\pm$ 1.17                       |
| TNC         | Extracellular Matrix                             | Adult       | 1.73 $\pm$ 0.64                    | <b>4.25 <math>\pm</math> 2.90</b>     | <b>3.47 <math>\pm</math> 2.75</b>     |
|             |                                                  | Hatchling   | 1.80 $\pm$ 0.47                    | 0.89 $\pm$ 0.27                       | 0.71 $\pm$ 0.10                       |
| HA1F-like   | Immune Response                                  | Adult       | 4.33 $\pm$ 2.73                    | <b>71.86 <math>\pm</math> 62.86</b>   | <b>103.23 <math>\pm</math> 78.15</b>  |
|             |                                                  | Hatchling   | 0.18 $\pm$ 0.12                    | 0.20 $\pm$ 0.16                       | 0.38 $\pm$ 0.32                       |
| FUT2-like   | Immune Response: glycosylation                   | Adult       | 3.69 $\pm$ 1.48                    | <b>90.46 <math>\pm</math> 88.42</b>   | <b>89.55 <math>\pm</math> 83.44</b>   |
|             |                                                  | Hatchling   | 3.60 $\pm$ 1.03                    | 2.74 $\pm$ 0.33                       | 1.87 $\pm$ 0.52                       |
| FUT2-like   | Immune Response: glycosylation                   | Adult       | 1.99 $\pm$ 0.54                    | <b>165.20 <math>\pm</math> 163.72</b> | <b>159.80 <math>\pm</math> 154.12</b> |
|             |                                                  | Hatchling   | 2.81 $\pm$ 0.51                    | 2.92 $\pm$ 1.09                       | 1.47 $\pm$ 0.44                       |
| LYZ-like    | Immune Response: Lysozome                        | Adult       | 11.55 $\pm$ 5.37                   | <b>34.18 <math>\pm</math> 27.26</b>   | <b>126.04 <math>\pm</math> 78.28</b>  |
|             |                                                  | Hatchling   | 15.37 $\pm$ 14.37                  | 1.36 $\pm$ 1.01                       | 7.24 $\pm$ 6.31                       |
| MR1-like    | Immune Response: MAIT lymphocyte Development     | Adult       | 0.00 $\pm$ 0.00                    | <b>12.84 <math>\pm</math> 12.76</b>   | <b>9.07 <math>\pm</math> 9.03</b>     |
|             |                                                  | Hatchling   | 0.00 $\pm$ 0.00                    | 0.00 $\pm$ 0.00                       | 0.00 $\pm$ 0.00                       |

| Gene         | Classification                            | Development | Control Mean $\pm$ SEM FPKM        | Anoxia Mean $\pm$ SEM FPKM            | Recovery Mean $\pm$ SEM FPKM        |
|--------------|-------------------------------------------|-------------|------------------------------------|---------------------------------------|-------------------------------------|
| CLCA1-like   | Membrane Transport: Chloride Conductance  | Adult       | 2.93 $\pm$ 0.93                    | <b>12.20 <math>\pm</math> 6.14</b>    | <b>19.84 <math>\pm</math> 14.19</b> |
|              |                                           | Hatchling   | 1.33 $\pm$ 0.71                    | 1.22 $\pm$ 0.53                       | 0.36 $\pm$ 0.24                     |
| LOC101934031 | Uncharacterized                           | Adult       | 1.05 $\pm$ 0.42                    | <b>3.52 <math>\pm</math> 1.22</b>     | <b>4.55 <math>\pm</math> 1.19</b>   |
|              |                                           | Hatchling   | 1.66 $\pm$ 0.81                    | 1.38 $\pm$ 0.95                       | 1.53 $\pm$ 0.84                     |
| FGL1         | Development: Mitogenic Acitivity          | Adult       | 5.14 $\pm$ 1.49                    | <b>13.58 <math>\pm</math> 5.16</b>    | <b>11.05 <math>\pm</math> 1.91</b>  |
|              |                                           | Hatchling   | 5.10 $\pm$ 0.86                    | 3.03 $\pm$ 0.61                       | 3.37 $\pm$ 0.37                     |
| TRIM36       | Cell Cycle                                | Adult       | <b>2.29 <math>\pm</math> 0.58</b>  | <b>5.07 <math>\pm</math> 2.09</b>     | 2.01 $\pm$ 0.34                     |
|              |                                           | Hatchling   | 1.11 $\pm$ 0.15                    | 1.51 $\pm$ 0.28                       | 1.54 $\pm$ 0.56                     |
| ATL1         | GTPase Activity                           | Adult       | 6.94 $\pm$ 1.84                    | <b>18.84 <math>\pm</math> 10.87</b>   | 6.86 $\pm$ 1.40                     |
|              |                                           | Hatchling   | 4.71 $\pm$ 1.38                    | 4.93 $\pm$ 1.43                       | 4.55 $\pm$ 1.61                     |
| CYP2D14-like | Catabolism: Monooxygenase                 | Adult       | 2.45 $\pm$ 0.22                    | <b>5.72 <math>\pm</math> 1.82</b>     | 2.51 $\pm$ 1.06                     |
|              |                                           | Hatchling   | 2.20 $\pm$ 0.67                    | 2.88 $\pm$ 1.35                       | 2.30 $\pm$ 0.75                     |
| CSRP2        | Development: Smooth Muscle Proliferation  | Adult       | 19.52 $\pm$ 2.13                   | <b>45.91 <math>\pm</math> 14.08</b>   | 32.60 $\pm$ 10.42                   |
|              |                                           | Hatchling   | 20.60 $\pm$ 2.23                   | 19.50 $\pm$ 3.82                      | 18.87 $\pm$ 2.73                    |
| LZTS3        | Development: Mitogenic Acitivity          | Adult       | 2.10 $\pm$ 1.01                    | <b>4.60 <math>\pm</math> 1.01</b>     | 1.27 $\pm$ 0.15                     |
|              |                                           | Hatchling   | 2.15 $\pm$ 0.78                    | 2.07 $\pm$ 0.84                       | 1.49 $\pm$ 0.33                     |
| FCN2-like    | Immune Response: Complement Cascade       | Adult       | 56.73 $\pm$ 33.62                  | <b>270.38 <math>\pm</math> 78.45</b>  | 43.89 $\pm$ 23.30                   |
|              |                                           | Hatchling   | 47.11 $\pm$ 38.10                  | 23.23 $\pm$ 17.15                     | 60.62 $\pm$ 51.89                   |
| PATE3-like   | Uncharacterized                           | Adult       | 1.92 $\pm$ 0.93                    | <b>9.82 <math>\pm</math> 7.56</b>     | 0.92 $\pm$ 0.71                     |
|              |                                           | Hatchling   | 2.24 $\pm$ 1.61                    | 0.94 $\pm$ 0.63                       | 1.22 $\pm$ 1.06                     |
| SYT17        | Neuronal Development: Dendrite Maturation | Adult       | 2.21 $\pm$ 0.40                    | <b>5.38 <math>\pm</math> 1.62</b>     | 4.29 $\pm$ 1.65                     |
|              |                                           | Hatchling   | 2.64 $\pm$ 0.57                    | 2.29 $\pm$ 0.32                       | 3.51 $\pm$ 0.31                     |
| DLK1         | Signaling: Delta-Knotch Pathway           | Adult       | <b>10.00 <math>\pm</math> 3.47</b> | <b>24.33 <math>\pm</math> 11.19</b>   | <b>14.11 <math>\pm</math> 7.30</b>  |
|              |                                           | Hatchling   | 1.58 $\pm$ 0.84                    | 1.07 $\pm$ 0.39                       | 1.06 $\pm$ 0.29                     |
| TUBA8-like   | Cell Structure                            | Adult       | 55.54 $\pm$ 33.86                  | <b>150.36 <math>\pm</math> 131.72</b> | <b>58.08 <math>\pm</math> 36.14</b> |
|              |                                           | Hatchling   | 76.65 $\pm$ 62.26                  | 54.38 $\pm$ 38.59                     | 12.44 $\pm$ 3.19                    |
| TMEM108      | Neuronal Development: Dendrite Maturation | Adult       | 3.16 $\pm$ 1.07                    | <b>6.71 <math>\pm</math> 3.16</b>     | <b>5.78 <math>\pm</math> 1.92</b>   |
|              |                                           | Hatchling   | 3.43 $\pm$ 0.54                    | 2.86 $\pm$ 0.77                       | 1.62 $\pm$ 0.29                     |
| LOC101953705 | Uncharacterized                           | Adult       | <b>9.21 <math>\pm</math> 8.62</b>  | <b>43.85 <math>\pm</math> 24.31</b>   | <b>16.15 <math>\pm</math> 8.78</b>  |
|              |                                           | Hatchling   | 2.56 $\pm$ 2.22                    | 1.89 $\pm$ 1.69                       | 0.50 $\pm$ 0.45                     |
| ITGAD-like   | Signaling: ERK                            | Adult       | <b>1.27 <math>\pm</math> 0.22</b>  | <b>8.61 <math>\pm</math> 6.19</b>     | <b>2.36 <math>\pm</math> 0.60</b>   |
|              |                                           | Hatchling   | 0.30 $\pm$ 0.07                    | 0.53 $\pm$ 0.11                       | 0.88 $\pm$ 0.62                     |
| RAD51        | DNA Repair                                | Adult       | 2.48 $\pm$ 0.45                    | <b>10.97 <math>\pm</math> 8.35</b>    | 2.61 $\pm$ 0.36                     |
|              |                                           | Hatchling   | 4.79 $\pm$ 0.33                    | 4.73 $\pm$ 0.53                       | <b>5.24 <math>\pm</math> 0.47</b>   |

| Gene         | Classification                      | Development | Control Mean $\pm$ SEM FPKM          | Anoxia Mean $\pm$ SEM FPKM           | Recovery Mean $\pm$ SEM FPKM         |
|--------------|-------------------------------------|-------------|--------------------------------------|--------------------------------------|--------------------------------------|
| TES          | Cell Structure: Adhesion            | Adult       | <b>5.15 <math>\pm</math> 1.08</b>    | <b>10.52 <math>\pm</math> 6.20</b>   | <b>7.59 <math>\pm</math> 3.66</b>    |
|              |                                     | Hatchling   | 2.30 $\pm$ 0.47                      | 2.33 $\pm$ 0.16                      | 2.77 $\pm$ 0.25                      |
| LOC101944353 | Immune Response: Chemokine Activity | Adult       | <b>14.68 <math>\pm</math> 5.18</b>   | <b>33.72 <math>\pm</math> 17.54</b>  | <b>18.40 <math>\pm</math> 7.04</b>   |
|              |                                     | Hatchling   | 0.66 $\pm$ 0.11                      | 0.77 $\pm$ 0.30                      | 0.93 $\pm$ 0.22                      |
| CCL3-like    | Signaling: Chemokine                | Adult       | <b>2.15 <math>\pm</math> 0.90</b>    | 50.54 $\pm$ 46.34                    | <b>37.04 <math>\pm</math> 32.55</b>  |
|              |                                     | Hatchling   | 0.57 $\pm$ 0.37                      | 31.93 $\pm$ 31.65                    | 0.67 $\pm$ 0.32                      |
| S100A1       | Calcium Regulation                  | Adult       | 53.01 $\pm$ 11.87                    | <b>101.81 <math>\pm</math> 31.85</b> | <b>128.89 <math>\pm</math> 42.08</b> |
|              |                                     | Hatchling   | 40.34 $\pm$ 10.32                    | 43.32 $\pm$ 10.48                    | 34.71 $\pm$ 5.71                     |
| TRPV3        | Membrane Transport: Ion Conductance | Adult       | 2.03 $\pm$ 0.25                      | 3.83 $\pm$ 1.58                      | <b>4.28 <math>\pm</math> 1.52</b>    |
|              |                                     | Hatchling   | 1.91 $\pm$ 0.33                      | 1.84 $\pm$ 0.64                      | 1.72 $\pm$ 0.76                      |
| DDN1-like    | Immune Response: Antibacterial      | Adult       | 0.98 $\pm$ 0.48                      | 18.33 $\pm$ 17.32                    | 21.72 $\pm$ 15.31                    |
|              |                                     | Hatchling   | 0.25 $\pm$ 0.13                      | <b>0.08 <math>\pm</math> 0.05</b>    | 2.52 $\pm$ 0.98                      |
| MPEG1-like   | Cell Cycle                          | Adult       | 2.89 $\pm$ 0.75                      | 7.44 $\pm$ 2.63                      | 9.59 $\pm$ 3.24                      |
|              |                                     | Hatchling   | <b>10.15 <math>\pm</math> 5.66</b>   | 9.23 $\pm$ 8.79                      | 11.91 $\pm$ 11.26                    |
| GBP1-like    | Immune Response                     | Adult       | 0.00 $\pm$ 0.00                      | 4.94 $\pm$ 4.63                      | 4.82 $\pm$ 4.78                      |
|              |                                     | Hatchling   | 1.65 $\pm$ 1.62                      | <b>0.69 <math>\pm</math> 0.69</b>    | 2.16 $\pm$ 2.16                      |
| HA1F-like    | Immune Response                     | Adult       | 2.60 $\pm$ 2.36                      | 12.84 $\pm$ 5.43                     | 11.38 $\pm$ 4.61                     |
|              |                                     | Hatchling   | 7.63 $\pm$ 3.22                      | 8.88 $\pm$ 2.97                      | 10.17 $\pm$ 3.32                     |
| NMRK2        | Metabolism: NAD Metabolism          | Adult       | 22.72 $\pm$ 3.32                     | 103.92 $\pm$ 14.84                   | 99.52 $\pm$ 34.44                    |
|              |                                     | Hatchling   | 43.43 $\pm$ 6.43                     | 63.41 $\pm$ 9.81                     | 52.99 $\pm$ 7.38                     |
| G0S2         | Apoptosis                           | Adult       | 22.62 $\pm$ 8.58                     | 84.64 $\pm$ 5.64                     | 70.20 $\pm$ 9.92                     |
|              |                                     | Hatchling   | <b>67.50 <math>\pm</math> 11.80</b>  | 60.51 $\pm$ 12.82                    | 76.69 $\pm$ 16.95                    |
| WDR66        | Binding: Calcium                    | Adult       | 0.92 $\pm$ 0.28                      | 3.23 $\pm$ 0.95                      | 5.09 $\pm$ 3.05                      |
|              |                                     | Hatchling   | <b>1.99 <math>\pm</math> 0.83</b>    | 5.00 $\pm$ 3.03                      | 3.66 $\pm$ 1.58                      |
| NSUN7        | Binding: RNA                        | Adult       | 0.97 $\pm$ 0.30                      | 2.62 $\pm$ 0.51                      | 1.95 $\pm$ 0.56                      |
|              |                                     | Hatchling   | <b>2.91 <math>\pm</math> 0.48</b>    | 2.68 $\pm$ 0.11                      | 3.25 $\pm$ 0.21                      |
| ACTC1        | Contractility                       | Adult       | 55.32 $\pm$ 14.42                    | 150.33 $\pm$ 48.42                   | 144.37 $\pm$ 48.78                   |
|              |                                     | Hatchling   | <b>169.87 <math>\pm</math> 51.03</b> | 279.56 $\pm$ 115.40                  | 94.24 $\pm$ 9.84                     |
| ACTG2        | Contractility                       | Adult       | 30.08 $\pm$ 5.64                     | 89.64 $\pm$ 56.32                    | 76.01 $\pm$ 45.60                    |
|              |                                     | Hatchling   | <b>116.45 <math>\pm</math> 16.39</b> | 135.03 $\pm$ 29.95                   | 134.18 $\pm$ 42.26                   |
| BTN1A1-like  | Immune Response                     | Adult       | 1.52 $\pm$ 0.51                      | 2.79 $\pm$ 1.55                      | 3.56 $\pm$ 1.39                      |
|              |                                     | Hatchling   | 2.82 $\pm$ 1.01                      | 1.76 $\pm$ 0.87                      | 4.37 $\pm$ 1.48                      |
| CD55-like    | Immune Response: Complement Cascade | Adult       | 10.38 $\pm$ 2.97                     | 43.43 $\pm$ 26.35                    | 32.34 $\pm$ 25.21                    |
|              |                                     | Hatchling   | <b>22.78 <math>\pm</math> 9.57</b>   | 23.81 $\pm$ 9.16                     | 18.58 $\pm$ 6.21                     |

| Gene         | Classification                               | Development | Control Mean $\pm$ SEM FPKM        | Anoxia Mean $\pm$ SEM FPKM | Recovery Mean $\pm$ SEM FPKM |
|--------------|----------------------------------------------|-------------|------------------------------------|----------------------------|------------------------------|
| NMRK2        | NAD Biosynthesis                             | Adult       | 22.72 $\pm$ 3.32                   | 103.92 $\pm$ 14.84         | 99.52 $\pm$ 34.44            |
|              |                                              | Hatchling   | 43.43 $\pm$ 6.43                   | 63.41 $\pm$ 9.81           | 52.99 $\pm$ 7.38             |
| LOC101944303 | Uncharacterized                              | Adult       | 2.61 $\pm$ 0.88                    | 6.35 $\pm$ 0.95            | 6.37 $\pm$ 1.81              |
|              |                                              | Hatchling   | 3.46 $\pm$ 1.05                    | 3.80 $\pm$ 0.53            | 4.67 $\pm$ 1.10              |
| NR1D1-like   | Transcription Factor:<br>Circadian Clock     | Adult       | 4.08 $\pm$ 1.26                    | 10.68 $\pm$ 2.63           | 13.01 $\pm$ 4.46             |
|              |                                              | Hatchling   | <b>9.33 <math>\pm</math> 0.98</b>  | 12.95 $\pm$ 0.80           | 12.53 $\pm$ 1.88             |
| RNF182-like  | Immune Response                              | Adult       | 2.28 $\pm$ 0.35                    | 5.20 $\pm$ 1.24            | 4.69 $\pm$ 1.62              |
|              |                                              | Hatchling   | <b>5.77 <math>\pm</math> 2.55</b>  | 2.92 $\pm$ 1.19            | 4.68 $\pm$ 1.45              |
| ADAM23       | Cell-Cell Interactions                       | Adult       | 4.33 $\pm$ 2.02                    | 9.13 $\pm$ 2.61            | 7.55 $\pm$ 1.35              |
|              |                                              | Hatchling   | 5.44 $\pm$ 1.31                    | 6.53 $\pm$ 1.30            | 7.10 $\pm$ 1.49              |
| COL12A1      | Extracellular Matrix                         | Adult       | 1.18 $\pm$ 0.28                    | 2.76 $\pm$ 0.74            | 1.45 $\pm$ 0.34              |
|              |                                              | Hatchling   | 1.98 $\pm$ 0.65                    | 2.66 $\pm$ 0.86            | 2.60 $\pm$ 0.56              |
| CPPED1       | Cell Cycle: Apoptosis                        | Adult       | 2.26 $\pm$ 0.20                    | 4.74 $\pm$ 0.96            | 2.43 $\pm$ 0.25              |
|              |                                              | Hatchling   | 2.05 $\pm$ 0.62                    | 2.77 $\pm$ 0.79            | 2.43 $\pm$ 0.37              |
| CYP2D15-like | Binding: Heme                                | Adult       | 9.21 $\pm$ 2.64                    | 18.56 $\pm$ 8.17           | 11.57 $\pm$ 3.46             |
|              |                                              | Hatchling   | 9.34 $\pm$ 1.96                    | 14.77 $\pm$ 8.03           | 10.50 $\pm$ 2.07             |
| CYP8B1       | Catabolism:<br>Monooxygenase                 | Adult       | 12.54 $\pm$ 3.63                   | 42.08 $\pm$ 13.45          | 23.69 $\pm$ 9.85             |
|              |                                              | Hatchling   | <b>28.82 <math>\pm</math> 9.72</b> | 27.23 $\pm$ 7.35           | 19.47 $\pm$ 1.80             |
| DKK3         | Development: WNT<br>Signaling Antagonization | Adult       | 564.82 $\pm$ 112.50                | 1258.09 $\pm$ 487.31       | 1121.98 $\pm$ 430.53         |
|              |                                              | Hatchling   | 856.53 $\pm$ 119.53                | 780.98 $\pm$ 84.94         | 643.68 $\pm$ 56.63           |
| ENDOD1-like  | Dnase/Rnase Activity                         | Adult       | 2.03 $\pm$ 1.42                    | 4.42 $\pm$ 2.34            | 2.19 $\pm$ 1.85              |
|              |                                              | Hatchling   | <b>4.85 <math>\pm</math> 2.68</b>  | 2.38 $\pm$ 2.07            | 3.43 $\pm$ 2.06              |
| LOC101938243 | Uncharacterized                              | Adult       | 2.71 $\pm$ 0.65                    | 10.65 $\pm$ 7.29           | 4.98 $\pm$ 1.76              |
|              |                                              | Hatchling   | <b>6.62 <math>\pm</math> 0.53</b>  | 12.56 $\pm$ 6.82           | 7.36 $\pm$ 0.74              |
| LOC101941157 | Uncharacterized                              | Adult       | 1.86 $\pm$ 0.31                    | 4.78 $\pm$ 1.93            | 3.50 $\pm$ 0.47              |
|              |                                              | Hatchling   | <b>6.70 <math>\pm</math> 1.87</b>  | 4.77 $\pm$ 2.29            | 4.34 $\pm$ 0.68              |
| NT5C1A       | Metabolism: Adenosine                        | Adult       | 19.12 $\pm$ 3.91                   | 38.66 $\pm$ 4.14           | 28.69 $\pm$ 4.29             |
|              |                                              | Hatchling   | 14.41 $\pm$ 1.85                   | 14.83 $\pm$ 1.84           | 14.54 $\pm$ 2.00             |
| MYLK         | Contractility                                | Adult       | 5.68 $\pm$ 1.08                    | 12.57 $\pm$ 2.53           | 10.12 $\pm$ 2.18             |
|              |                                              | Hatchling   | 4.31 $\pm$ 0.65                    | 7.02 $\pm$ 2.27            | 6.76 $\pm$ 0.89              |
| PCSK9        | Lipoprotein Homeostasis                      | Adult       | 1.24 $\pm$ 0.27                    | 2.69 $\pm$ 0.74            | 2.42 $\pm$ 0.54              |
|              |                                              | Hatchling   | <b>2.93 <math>\pm</math> 0.62</b>  | 1.96 $\pm$ 0.57            | 1.98 $\pm$ 0.29              |
| SLC4A5       | Membrane Transport:<br>Acid/Base Balance     | Adult       | 1.53 $\pm$ 0.27                    | 3.13 $\pm$ 0.69            | 2.37 $\pm$ 0.37              |
|              |                                              | Hatchling   | 2.89 $\pm$ 0.90                    | 1.70 $\pm$ 0.40            | 3.80 $\pm$ 0.66              |

| Gene         | Classification                        | Development | Control Mean $\pm$ SEM FPKM        | Anoxia Mean $\pm$ SEM FPKM         | Recovery Mean $\pm$ SEM FPKM      |
|--------------|---------------------------------------|-------------|------------------------------------|------------------------------------|-----------------------------------|
| SNCB         | Apoptosis: Negative Regulation        | Adult       | 8.57 $\pm$ 5.00                    | 20.88 $\pm$ 7.79                   | 13.52 $\pm$ 2.57                  |
|              |                                       | Hatchling   | <b>22.63 <math>\pm</math> 4.66</b> | 24.73 $\pm$ 1.09                   | 20.11 $\pm$ 4.86                  |
| STARD13      | Signaling: GTPase                     | Adult       | 2.71 $\pm$ 0.65                    | 10.65 $\pm$ 7.29                   | 4.98 $\pm$ 1.76                   |
|              |                                       | Hatchling   | <b>6.62 <math>\pm</math> 0.53</b>  | 12.56 $\pm$ 6.82                   | 7.36 $\pm$ 0.74                   |
| TRIM10-like  | Immune Response                       | Adult       | 2.37 $\pm$ 1.04                    | 5.71 $\pm$ 2.98                    | 3.12 $\pm$ 2.16                   |
|              |                                       | Hatchling   | 1.31 $\pm$ 0.36                    | 0.42 $\pm$ 0.24                    | 1.34 $\pm$ 1.02                   |
| WDR41        | Autophagy Regulation                  | Adult       | 2.37 $\pm$ 0.43                    | 5.52 $\pm$ 0.30                    | 4.73 $\pm$ 0.84                   |
|              |                                       | Hatchling   | <b>3.22 <math>\pm</math> 0.45</b>  | 3.54 $\pm$ 0.31                    | 2.64 $\pm$ 0.42                   |
| SPATS2L      | Binding: RNA                          | Adult       | 3.24 $\pm$ 0.56                    | 7.18 $\pm$ 1.68                    | 4.03 $\pm$ 0.61                   |
|              |                                       | Hatchling   | 6.38 $\pm$ 0.74                    | 6.92 $\pm$ 0.79                    | <b>8.82 <math>\pm</math> 1.78</b> |
| ACTN3        | Contractility: Structural             | Adult       | 21.85 $\pm$ 6.35                   | 41.97 $\pm$ 6.91                   | 54.07 $\pm$ 15.90                 |
|              |                                       | Hatchling   | <b>73.85 <math>\pm</math> 5.80</b> | 83.38 $\pm$ 17.99                  | 64.79 $\pm$ 2.93                  |
| ADAM33       | Cell-Cell Interactions                | Adult       | 2.50 $\pm$ 0.48                    | 4.01 $\pm$ 0.89                    | 5.18 $\pm$ 0.97                   |
|              |                                       | Hatchling   | <b>8.96 <math>\pm</math> 1.81</b>  | 7.25 $\pm$ 0.92                    | 9.62 $\pm$ 0.42                   |
| BHLHE40      | Transcription Factor: repressor       | Adult       | 65.94 $\pm$ 14.02                  | 108.12 $\pm$ 24.75                 | 134.83 $\pm$ 11.78                |
|              |                                       | Hatchling   | 83.25 $\pm$ 10.30                  | 98.22 $\pm$ 13.75                  | 106.98 $\pm$ 16.97                |
| LTK          | Signaling: Protein Kinase             | Adult       | 6.67 $\pm$ 3.21                    | 13.33 $\pm$ 6.00                   | 15.38 $\pm$ 3.44                  |
|              |                                       | Hatchling   | <b>14.56 <math>\pm</math> 3.98</b> | 15.38 $\pm$ 3.71                   | 16.42 $\pm$ 7.06                  |
| LOC101936791 | Uncharacterized                       | Adult       | 2.32 $\pm$ 0.65                    | 1.90 $\pm$ 0.93                    | 5.82 $\pm$ 1.72                   |
|              |                                       | Hatchling   | 4.11 $\pm$ 1.32                    | <b>6.85 <math>\pm</math> 3.50</b>  | 5.55 $\pm$ 2.01                   |
| LOC101952373 | Uncharacterized                       | Adult       | 1.82 $\pm$ 0.37                    | 2.72 $\pm$ 0.52                    | 4.75 $\pm$ 0.87                   |
|              |                                       | Hatchling   | 3.09 $\pm$ 0.23                    | 3.18 $\pm$ 0.72                    | 5.01 $\pm$ 0.32                   |
| HSP30C-like  | Heat Shock Protein                    | Adult       | 66.37 $\pm$ 26.99                  | 119.20 $\pm$ 39.02                 | 261.66 $\pm$ 101.28               |
|              |                                       | Hatchling   | 48.65 $\pm$ 10.96                  | 62.58 $\pm$ 26.24                  | 107.11 $\pm$ 24.20                |
| HSP30C-like  | Heat Shock Protein                    | Adult       | 19.71 $\pm$ 9.41                   | 29.68 $\pm$ 7.49                   | 59.30 $\pm$ 17.53                 |
|              |                                       | Hatchling   | 15.75 $\pm$ 4.43                   | 22.76 $\pm$ 5.25                   | 35.57 $\pm$ 8.34                  |
| TRIM69-like  | Cell Cycle: Apoptosis                 | Adult       | 2.37 $\pm$ 0.86                    | 3.34 $\pm$ 2.01                    | 5.49 $\pm$ 2.19                   |
|              |                                       | Hatchling   | 4.52 $\pm$ 1.30                    | 3.10 $\pm$ 0.96                    | 7.22 $\pm$ 2.29                   |
| RGMA         | Neuronal Development: Axon Maturation | Adult       | 1.73 $\pm$ 0.24                    | 2.67 $\pm$ 0.88                    | 3.58 $\pm$ 1.67                   |
|              |                                       | Hatchling   | <b>5.65 <math>\pm</math> 0.13</b>  | <b>5.64 <math>\pm</math> 0.97</b>  | 6.80 $\pm$ 1.13                   |
| MDP1         | Phosphatase Activity                  | Adult       | 11.84 $\pm$ 5.93                   | 12.69 $\pm$ 3.11                   | 26.89 $\pm$ 9.27                  |
|              |                                       | Hatchling   | <b>29.55 <math>\pm</math> 3.67</b> | <b>27.86 <math>\pm</math> 3.39</b> | 32.29 $\pm$ 6.72                  |
| UCP3         | Respiratory electron transport        | Adult       | 2.68 $\pm$ 1.55                    | 15.01 $\pm$ 10.35                  | 6.16 $\pm$ 4.26                   |
|              |                                       | Hatchling   | <b>8.85 <math>\pm</math> 3.02</b>  | <b>19.89 <math>\pm</math> 8.98</b> | 7.10 $\pm$ 2.32                   |



| Gene         | Classification                      | Development | Control Mean $\pm$ SEM FPKM           | Anoxia Mean $\pm$ SEM FPKM            | Recovery Mean $\pm$ SEM FPKM           |
|--------------|-------------------------------------|-------------|---------------------------------------|---------------------------------------|----------------------------------------|
| CEACAM16     | Cell Structure: Adhesion            | Adult       | 0.61 $\pm$ 0.16                       | 0.78 $\pm$ 0.32                       | 1.57 $\pm$ 0.47                        |
|              |                                     | Hatchling   | <b>4.19 <math>\pm</math> 1.52</b>     | <b>7.23 <math>\pm</math> 2.24</b>     | <b>11.36 <math>\pm</math> 4.44</b>     |
| SERPINH1     | Collagen Biosynthesis               | Adult       | 38.33 $\pm$ 9.95                      | 71.52 $\pm$ 6.72                      | 77.87 $\pm$ 8.00                       |
|              |                                     | Hatchling   | <b>124.50 <math>\pm</math> 21.21</b>  | 134.98 $\pm$ 12.72                    | <b>182.17 <math>\pm</math> 10.89</b>   |
| MYL4         | Contractility                       | Adult       | 1.78 $\pm$ 1.12                       | 6.35 $\pm$ 5.02                       | 0.87 $\pm$ 0.07                        |
|              |                                     | Hatchling   | <b>420.04 <math>\pm</math> 129.42</b> | <b>412.53 <math>\pm</math> 55.19</b>  | <b>502.40 <math>\pm</math> 56.83</b>   |
| S100A12      | Immune Response: Calcium Regulation | Adult       | 137.86 $\pm$ 31.38                    | 166.04 $\pm$ 32.51                    | 353.25 $\pm$ 80.68                     |
|              |                                     | Hatchling   | <b>520.35 <math>\pm</math> 159.93</b> | <b>876.76 <math>\pm</math> 134.59</b> | <b>1473.19 <math>\pm</math> 385.70</b> |
| LOC101935919 | Immune Response: Chemokine Activity | Adult       | 1.67 $\pm$ 0.29                       | 1.92 $\pm$ 0.63                       | 4.05 $\pm$ 1.93                        |
|              |                                     | Hatchling   | <b>7.52 <math>\pm</math> 1.97</b>     | <b>9.39 <math>\pm</math> 2.69</b>     | <b>16.63 <math>\pm</math> 2.04</b>     |
| TLR5         | Immune Response: Chemokine Activity | Adult       | 3.78 $\pm$ 0.87                       | 3.27 $\pm$ 0.81                       | 7.55 $\pm$ 2.16                        |
|              |                                     | Hatchling   | <b>16.84 <math>\pm</math> 4.84</b>    | <b>21.69 <math>\pm</math> 4.70</b>    | <b>41.38 <math>\pm</math> 6.98</b>     |
| GATM         | Metabolism: Creatine Biosynthesis   | Adult       | 0.64 $\pm$ 0.33                       | 0.83 $\pm$ 0.14                       | 1.81 $\pm$ 0.50                        |
|              |                                     | Hatchling   | <b>3.15 <math>\pm</math> 0.77</b>     | <b>5.03 <math>\pm</math> 1.20</b>     | <b>9.30 <math>\pm</math> 2.02</b>      |

Significant increases from control FPKM (log2 fold-change  $\geq$  1) are highlighted in green while significant decreases from control FPKM (log2 fold-change  $\leq$  -1) are highlighted in purple. Genes that are also significant different between development stages during anoxia or recovery (log2 fold-change  $\geq$  1 or  $\leq$  -1) are highlighted in yellow.

Table S5: Potential Constitutively-Adapted Genes During Anoxia and Recovery

| Gene          | Classification                                | Development | Control Mean $\pm$<br>SEM FPKM     | Anoxia Mean $\pm$<br>SEM FPKM        | Recovery Mean $\pm$<br>SEM FPKM     |
|---------------|-----------------------------------------------|-------------|------------------------------------|--------------------------------------|-------------------------------------|
| MYH11         | Contractility                                 | Adult       | <b>15.41 <math>\pm</math> 4.76</b> | <b>28.11 <math>\pm</math> 15.59</b>  | <b>19.49 <math>\pm</math> 11.96</b> |
|               |                                               | Hatchling   | 1.66 $\pm$ 0.36                    | 4.59 $\pm$ 2.29                      | 5.00 $\pm$ 1.28                     |
| CFB           | Immune Response:<br>Complement Cascade        | Adult       | 7.45 $\pm$ 5.65                    | 13.20 $\pm$ 4.52                     | 8.91 $\pm$ 4.09                     |
|               |                                               | Hatchling   | 4.70 $\pm$ 1.61                    | 10.11 $\pm$ 3.89                     | 10.25 $\pm$ 2.40                    |
| Histone H1    | Nucleosome                                    | Adult       | <b>9.64 <math>\pm</math> 1.67</b>  | 15.20 $\pm$ 2.55                     | 18.40 $\pm$ 6.71                    |
|               |                                               | Hatchling   | 4.06 $\pm$ 0.93                    | 13.04 $\pm$ 3.39                     | 13.36 $\pm$ 1.98                    |
| HIST1H1A-like | Nucleosome                                    | Adult       | <b>4.33 <math>\pm</math> 0.97</b>  | 6.72 $\pm$ 1.48                      | 5.60 $\pm$ 1.61                     |
|               |                                               | Hatchling   | 2.15 $\pm$ 0.32                    | 7.10 $\pm$ 1.99                      | 6.51 $\pm$ 0.53                     |
| IL1RL1        | Signaling: ERK                                | Adult       | <b>4.64 <math>\pm</math> 2.06</b>  | <b>6.89 <math>\pm</math> 1.75</b>    | <b>4.16 <math>\pm</math> 1.21</b>   |
|               |                                               | Hatchling   | 1.10 $\pm$ 0.31                    | 2.85 $\pm$ 1.79                      | 2.01 $\pm$ 0.54                     |
| CYP2D15-like  | Binding: Heme                                 | Adult       | <b>15.44 <math>\pm</math> 2.09</b> | 15.84 $\pm$ 1.32                     | 13.08 $\pm$ 3.06                    |
|               |                                               | Hatchling   | 6.23 $\pm$ 0.47                    | 15.23 $\pm$ 3.77                     | 8.31 $\pm$ 2.74                     |
| Histone H2B 8 | Nucleosome                                    | Adult       | <b>12.35 <math>\pm</math> 3.43</b> | 12.36 $\pm$ 2.60                     | 11.07 $\pm$ 4.01                    |
|               |                                               | Hatchling   | 5.04 $\pm$ 0.64                    | 13.29 $\pm$ 2.92                     | 9.80 $\pm$ 1.54                     |
| LCP1          | Binding: Actin                                | Adult       | <b>6.38 <math>\pm</math> 1.63</b>  | <b>8.92 <math>\pm</math> 2.17</b>    | 6.75 $\pm$ 0.64                     |
|               |                                               | Hatchling   | 2.42 $\pm$ 0.33                    | 3.25 $\pm$ 0.41                      | 5.04 $\pm$ 0.67                     |
| LY6E-like     | Signaling: nAChR<br>modulation                | Adult       | <b>72.06 <math>\pm</math> 2.18</b> | <b>112.04 <math>\pm</math> 35.88</b> | <b>82.82 <math>\pm</math> 47.13</b> |
|               |                                               | Hatchling   | 7.78 $\pm$ 1.44                    | 13.44 $\pm$ 4.41                     | 21.77 $\pm$ 5.45                    |
| FOSB          | Transcription Factor: Cell<br>Differentiation | Adult       | <b>6.50 <math>\pm</math> 3.52</b>  | <b>9.20 <math>\pm</math> 4.54</b>    | <b>7.99 <math>\pm</math> 1.85</b>   |
|               |                                               | Hatchling   | 1.15 $\pm$ 0.21                    | 0.84 $\pm$ 0.23                      | 3.00 $\pm$ 0.68                     |
| PSAP-like     | Signaling                                     | Adult       | <b>11.97 <math>\pm</math> 1.54</b> | <b>19.97 <math>\pm</math> 6.14</b>   | <b>13.60 <math>\pm</math> 4.91</b>  |
|               |                                               | Hatchling   | 1.71 $\pm$ 0.19                    | 2.49 $\pm$ 0.54                      | 6.73 $\pm$ 4.68                     |
| SLC16A6       | Membrane Transport:<br>Monocarboxylate        | Adult       | 12.49 $\pm$ 2.40                   | <b>22.43 <math>\pm</math> 9.10</b>   | 16.50 $\pm$ 2.82                    |
|               |                                               | Hatchling   | 9.66 $\pm$ 1.46                    | 11.62 $\pm$ 1.90                     | 24.94 $\pm$ 2.10                    |
| SIGLEC12      | Signaling: Cell Surface<br>Receptor           | Adult       | <b>6.50 <math>\pm</math> 2.09</b>  | 3.73 $\pm$ 1.15                      | 4.26 $\pm$ 1.86                     |
|               |                                               | Hatchling   | 2.66 $\pm$ 0.55                    | 2.08 $\pm$ 0.81                      | 5.98 $\pm$ 1.77                     |
| NMRK2-like    | NAD Biosynthesis                              | Adult       | 29.39 $\pm$ 5.83                   | 49.59 $\pm$ 19.86                    | 30.69 $\pm$ 9.47                    |
|               |                                               | Hatchling   | 25.09 $\pm$ 6.71                   | 33.94 $\pm$ 6.98                     | 50.25 $\pm$ 12.91                   |
| TAF1C-like    | Transcriptional Regulation                    | Adult       | 2.62 $\pm$ 0.81                    | 2.41 $\pm$ 0.35                      | 2.37 $\pm$ 0.59                     |
|               |                                               | Hatchling   | 2.02 $\pm$ 0.39                    | 3.31 $\pm$ 0.38                      | 4.48 $\pm$ 1.02                     |
| LOC101951613  | uncharacterized                               | Adult       | 1.84 $\pm$ 0.33                    | 2.63 $\pm$ 0.63                      | 2.87 $\pm$ 0.35                     |
|               |                                               | Hatchling   | 2.27 $\pm$ 0.63                    | 3.10 $\pm$ 0.57                      | 4.98 $\pm$ 0.94                     |
| LOC101943676  | uncharacterized                               | Adult       | 0.11 $\pm$ 0.11                    | 1.68 $\pm$ 0.60                      | 2.05 $\pm$ 1.14                     |
|               |                                               | Hatchling   | <b>14.42 <math>\pm</math> 6.88</b> | <b>30.83 <math>\pm</math> 19.87</b>  | <b>29.64 <math>\pm</math> 12.42</b> |

| Gene         | Classification                             | Development | Control Mean $\pm$ SEM FPKM          | Anoxia Mean $\pm$ SEM FPKM           | Recovery Mean $\pm$ SEM FPKM         |
|--------------|--------------------------------------------|-------------|--------------------------------------|--------------------------------------|--------------------------------------|
| AIF1L        | Contractility: Actin Binding               | Adult       | 12.05 $\pm$ 2.63                     | 11.72 $\pm$ 1.80                     | 15.04 $\pm$ 3.45                     |
|              |                                            | Hatchling   | <b>32.50 <math>\pm</math> 2.75</b>   | 15.71 $\pm$ 4.64                     | 13.20 $\pm$ 2.82                     |
| HA1F-like    | Immune Response                            | Adult       | 1.69 $\pm$ 0.19                      | 1.45 $\pm$ 0.40                      | 1.00 $\pm$ 0.28                      |
|              |                                            | Hatchling   | <b>5.35 <math>\pm</math> 4.29</b>    | 1.94 $\pm$ 0.74                      | 1.68 $\pm$ 0.44                      |
| EPCAM        | Cell Structure: Adhesion                   | Adult       | 3.40 $\pm$ 0.65                      | 4.22 $\pm$ 1.50                      | 3.09 $\pm$ 0.69                      |
|              |                                            | Hatchling   | <b>8.06 <math>\pm</math> 4.59</b>    | 2.98 $\pm$ 0.27                      | 3.05 $\pm$ 1.05                      |
| VCAN         | Cell Proliferation: Regulation             | Adult       | 6.29 $\pm$ 1.75                      | 3.78 $\pm$ 0.53                      | 4.04 $\pm$ 0.77                      |
|              |                                            | Hatchling   | <b>16.14 <math>\pm</math> 8.59</b>   | 6.57 $\pm$ 0.62                      | <b>16.64 <math>\pm</math> 9.72</b>   |
| IGFBPL1      | Growth Factor                              | Adult       | 164.49 $\pm$ 39.08                   | <b>242.73 <math>\pm</math> 26.88</b> | 202.62 $\pm$ 55.15                   |
|              |                                            | Hatchling   | 126.44 $\pm$ 30.66                   | 48.86 $\pm$ 31.76                    | 126.39 $\pm$ 71.89                   |
| FCN2-like    | Immune Response: Complement Cascade        | Adult       | <b>154.00 <math>\pm</math> 16.65</b> | <b>129.81 <math>\pm</math> 34.22</b> | <b>135.04 <math>\pm</math> 28.84</b> |
|              |                                            | Hatchling   | 23.53 $\pm$ 9.33                     | 6.07 $\pm$ 2.15                      | 15.77 $\pm$ 8.46                     |
| EGR1         | Transcription Factor: Cell Differentiation | Adult       | 84.66 $\pm$ 17.73                    | 70.92 $\pm$ 14.02                    | 102.79 $\pm$ 11.47                   |
|              |                                            | Hatchling   | 85.87 $\pm$ 30.65                    | 42.49 $\pm$ 6.99                     | 70.81 $\pm$ 13.68                    |
| LOC101952225 | Uncharacterized                            | Adult       | 1.76 $\pm$ 0.89                      | <b>2.51 <math>\pm</math> 0.33</b>    | <b>3.16 <math>\pm</math> 1.58</b>    |
|              |                                            | Hatchling   | 2.67 $\pm$ 2.09                      | 0.86 $\pm$ 0.23                      | 1.56 $\pm$ 0.41                      |
| KCNJ5        | Signaling: Membrane Potential              | Adult       | 0.59 $\pm$ 0.59                      | 0.03 $\pm$ 0.02                      | 0.02 $\pm$ 0.02                      |
|              |                                            | Hatchling   | <b>8.65 <math>\pm</math> 4.77</b>    | <b>8.56 <math>\pm</math> 4.36</b>    | <b>4.31 <math>\pm</math> 1.70</b>    |
| ITLN-like    | Immune Response                            | Adult       | 0.08 $\pm$ 0.05                      | 0.20 $\pm$ 0.09                      | 0.21 $\pm$ 0.08                      |
|              |                                            | Hatchling   | <b>11.27 <math>\pm</math> 6.38</b>   | <b>11.51 <math>\pm</math> 6.48</b>   | <b>4.09 <math>\pm</math> 3.46</b>    |
| RPL37A-like  | Translation                                | Adult       | 611.29 $\pm$ 93.38                   | 533.84 $\pm$ 178.65                  | 535.44 $\pm$ 327.86                  |
|              |                                            | Hatchling   | 1178.07 $\pm$ 212.75                 | 775.66 $\pm$ 119.63                  | 344.87 $\pm$ 119.54                  |
| TUBA1D-like  | Cell Structure                             | Adult       | 5.14 $\pm$ 0.26                      | 6.88 $\pm$ 2.93                      | 8.41 $\pm$ 1.80                      |
|              |                                            | Hatchling   | <b>14.96 <math>\pm</math> 3.86</b>   | <b>14.19 <math>\pm</math> 6.14</b>   | 4.86 $\pm$ 2.46                      |
| CR1L         | Immune Response: Complement Cascade        | Adult       | 95.17 $\pm$ 60.67                    | 111.77 $\pm$ 39.07                   | <b>91.58 <math>\pm</math> 34.10</b>  |
|              |                                            | Hatchling   | 184.09 $\pm$ 63.48                   | 125.12 $\pm$ 37.95                   | 18.46 $\pm$ 3.25                     |
| TAF13        | Transcriptional Regulation                 | Adult       | 21.39 $\pm$ 4.27                     | 17.42 $\pm$ 3.86                     | <b>15.41 <math>\pm</math> 1.76</b>   |
|              |                                            | Hatchling   | 18.12 $\pm$ 2.71                     | 11.32 $\pm$ 2.56                     | 6.70 $\pm$ 1.03                      |
| LOC101942727 | Uncharacterized                            | Adult       | <b>13.88 <math>\pm</math> 4.73</b>   | 8.96 $\pm$ 1.72                      | <b>26.71 <math>\pm</math> 5.87</b>   |
|              |                                            | Hatchling   | 6.29 $\pm$ 3.03                      | <b>4.78 <math>\pm</math> 4.29</b>    | 2.17 $\pm$ 0.87                      |

Significant increases from control FPKM (log2 fold-change  $\geq$  1) are highlighted in green while significant decreases from control FPKM (log2 fold-change  $\leq$  -1) are highlighted in purple. Genes that are also significant different between development stages during anoxia or recovery (log2 fold-change  $\geq$  1 or  $\leq$  -1) are highlighted in yellow.

Table S6. Potential Maladaptive Genes During Anoxia and Recovery.

| Gene        | Classification                                   | Development | Control Mean $\pm$ SEM FPKM          | Anoxia Mean $\pm$ SEM FPKM           | Recovery Mean $\pm$ SEM FPKM         |
|-------------|--------------------------------------------------|-------------|--------------------------------------|--------------------------------------|--------------------------------------|
| THBS4       | Cell-Cell Interactions                           | Adult       | 3.81 $\pm$ 1.21                      | 0.78 $\pm$ 0.34                      | 1.03 $\pm$ 0.37                      |
|             |                                                  | Hatchling   | 3.32 $\pm$ 1.05                      | <b>6.51 <math>\pm</math> 1.07</b>    | <b>4.43 <math>\pm</math> 1.14</b>    |
| MAP2-like   | Cell Structure                                   | Adult       | 20.81 $\pm$ 6.21                     | 8.85 $\pm$ 2.15                      | 9.41 $\pm$ 2.23                      |
|             |                                                  | Hatchling   | 31.44 $\pm$ 6.77                     | 15.29 $\pm$ 2.37                     | <b>28.95 <math>\pm</math> 3.42</b>   |
| MYH6        | Contractility                                    | Adult       | 5.43 $\pm$ 4.74                      | 0.70 $\pm$ 0.22                      | 2.58 $\pm$ 1.00                      |
|             |                                                  | Hatchling   | <b>97.49 <math>\pm</math> 19.71</b>  | <b>144.37 <math>\pm</math> 48.36</b> | <b>73.74 <math>\pm</math> 25.88</b>  |
| CYR61       | Development: Cell Adhesion                       | Adult       | 94.34 $\pm$ 37.28                    | 30.45 $\pm$ 6.38                     | 36.98 $\pm$ 11.46                    |
|             |                                                  | Hatchling   | <b>493.10 <math>\pm</math> 99.99</b> | <b>367.69 <math>\pm</math> 70.00</b> | <b>216.97 <math>\pm</math> 54.51</b> |
| CLEC2D-like | Signaling: Cell Surface Receptor                 | Adult       | 24.92 $\pm$ 13.31                    | 1.40 $\pm$ 0.63                      | 2.37 $\pm$ 1.06                      |
|             |                                                  | Hatchling   | 17.92 $\pm$ 11.89                    | <b>18.03 <math>\pm</math> 9.30</b>   | <b>6.52 <math>\pm</math> 3.08</b>    |
| MATN4       | Extracellular Matrix                             | Adult       | 2.41 $\pm$ 1.94                      | 0.38 $\pm$ 0.09                      | 0.43 $\pm$ 0.11                      |
|             |                                                  | Hatchling   | 6.13 $\pm$ 1.45                      | <b>8.84 <math>\pm</math> 2.31</b>    | <b>8.48 <math>\pm</math> 0.50</b>    |
| B3GNT4-like | Glycoprotein synthesis                           | Adult       | <b>5.70 <math>\pm</math> 1.96</b>    | 1.47 $\pm$ 0.76                      | 1.38 $\pm$ 0.80                      |
|             |                                                  | Hatchling   | 2.07 $\pm$ 1.20                      | <b>3.82 <math>\pm</math> 0.93</b>    | 1.99 $\pm$ 1.26                      |
| NPPA-like   | Hormone Activity: Cardiovascular Homeostasis     | Adult       | <b>107.38 <math>\pm</math> 61.36</b> | 16.56 $\pm$ 13.90                    | 10.13 $\pm$ 4.76                     |
|             |                                                  | Hatchling   | 46.86 $\pm$ 11.13                    | <b>134.69 <math>\pm</math> 71.29</b> | <b>72.31 <math>\pm</math> 25.13</b>  |
| GATA1       | Transcription Factor: Cell Differentiation       | Adult       | 6.96 $\pm$ 1.14                      | 3.01 $\pm$ 0.66                      | 4.70 $\pm$ 1.52                      |
|             |                                                  | Hatchling   | 7.01 $\pm$ 0.63                      | <b>11.59 <math>\pm</math> 1.41</b>   | <b>11.32 <math>\pm</math> 0.85</b>   |
| MFAP4       | Cell Structure: Adhesion                         | Adult       | 20.96 $\pm$ 3.10                     | 10.41 $\pm$ 1.23                     | 15.54 $\pm$ 2.51                     |
|             |                                                  | Hatchling   | 29.99 $\pm$ 8.94                     | <b>34.27 <math>\pm</math> 6.31</b>   | <b>34.05 <math>\pm</math> 3.97</b>   |
| SOWAHC-like | Uncharacterized                                  | Adult       | 13.17 $\pm$ 5.78                     | 6.34 $\pm$ 0.96                      | 7.99 $\pm$ 2.71                      |
|             |                                                  | Hatchling   | 19.39 $\pm$ 3.23                     | <b>21.75 <math>\pm</math> 2.60</b>   | <b>27.84 <math>\pm</math> 3.83</b>   |
| GSTM1-like  | Metabolism: Glutathione Metabolism               | Adult       | 14.82 $\pm$ 7.03                     | 4.54 $\pm$ 0.36                      | 8.33 $\pm$ 1.74                      |
|             |                                                  | Hatchling   | 14.41 $\pm$ 8.04                     | <b>13.98 <math>\pm</math> 1.30</b>   | 6.81 $\pm$ 0.90                      |
| GSTM1-like  | Metabolism: Glutathione Metabolism               | Adult       | 59.51 $\pm$ 25.06                    | 22.59 $\pm$ 3.99                     | 39.59 $\pm$ 8.03                     |
|             |                                                  | Hatchling   | 64.04 $\pm$ 29.22                    | <b>53.61 <math>\pm</math> 4.37</b>   | 34.27 $\pm$ 4.36                     |
| IGFBP2      | Growth Factor                                    | Adult       | 4.56 $\pm$ 2.63                      | 1.00 $\pm$ 0.25                      | 8.31 $\pm$ 4.99                      |
|             |                                                  | Hatchling   | <b>10.58 <math>\pm</math> 5.46</b>   | <b>11.81 <math>\pm</math> 4.09</b>   | 14.99 $\pm$ 4.87                     |
| MLXIPL      | Transcription Factor: Triglyceride Synthesis     | Adult       | 6.31 $\pm$ 1.49                      | 3.13 $\pm$ 0.78                      | 5.78 $\pm$ 1.35                      |
|             |                                                  | Hatchling   | 7.28 $\pm$ 1.29                      | <b>8.02 <math>\pm</math> 0.61</b>    | 6.98 $\pm$ 0.87                      |
| TIGD4-like  | Biding: Chromatin                                | Adult       | 3.89 $\pm$ 0.99                      | 1.64 $\pm$ 0.13                      | 2.04 $\pm$ 0.29                      |
|             |                                                  | Hatchling   | 3.71 $\pm$ 0.53                      | 3.20 $\pm$ 0.71                      | <b>4.47 <math>\pm</math> 0.39</b>    |
| PRKACA-like | Post Translational Modification: Phosphorylation | Adult       | 2.79 $\pm$ 1.20                      | 2.53 $\pm$ 0.71                      | 3.17 $\pm$ 0.84                      |
|             |                                                  | Hatchling   | 1.84 $\pm$ 0.22                      | <b>5.08 <math>\pm</math> 1.84</b>    | <b>4.65 <math>\pm</math> 1.74</b>    |

| Gene           | Classification                       | Development | Control Mean $\pm$ SEM FPKM          | Anoxia Mean $\pm$ SEM FPKM             | Recovery Mean $\pm$ SEM FPKM           |
|----------------|--------------------------------------|-------------|--------------------------------------|----------------------------------------|----------------------------------------|
| APOH           | Binding: Coagulation                 | Adult       | <b>25.95 <math>\pm</math> 9.11</b>   | 13.76 $\pm$ 6.03                       | 5.74 $\pm$ 5.49                        |
|                |                                      | Hatchling   | 7.56 $\pm$ 4.47                      | 10.10 $\pm$ 4.55                       | <b>16.97 <math>\pm</math> 1.48</b>     |
| RPRM           | Cell Cycle                           | Adult       | 4.37 $\pm$ 2.47                      | 3.22 $\pm$ 0.33                        | 1.69 $\pm$ 0.59                        |
|                |                                      | Hatchling   | 4.68 $\pm$ 0.62                      | <b>8.14 <math>\pm</math> 3.01</b>      | <b>6.10 <math>\pm</math> 2.64</b>      |
| TP53I11        | Cell Proliferation: Regulation       | Adult       | 8.99 $\pm$ 5.17                      | 6.33 $\pm$ 1.78                        | 3.35 $\pm$ 0.39                        |
|                |                                      | Hatchling   | 13.26 $\pm$ 5.68                     | 11.78 $\pm$ 8.58                       | <b>9.86 <math>\pm</math> 5.74</b>      |
| CPE            | Peptide Synthesis                    | Adult       | 6.18 $\pm$ 1.13                      | 4.84 $\pm$ 1.71                        | 2.30 $\pm$ 0.29                        |
|                |                                      | Hatchling   | <b>16.05 <math>\pm</math> 2.98</b>   | <b>21.85 <math>\pm</math> 2.80</b>     | <b>18.51 <math>\pm</math> 1.25</b>     |
| MYL2           | Contractility                        | Adult       | 1.04 $\pm$ 0.44                      | 1.36 $\pm$ 0.27                        | 2.13 $\pm$ 0.14                        |
|                |                                      | Hatchling   | <b>38.76 <math>\pm</math> 6.60</b>   | <b>86.73 <math>\pm</math> 27.57</b>    | <b>103.70 <math>\pm</math> 36.74</b>   |
| ELN            | Extracellular Matrix                 | Adult       | 2.67 $\pm$ 0.93                      | 2.40 $\pm$ 0.49                        | 2.31 $\pm$ 0.32                        |
|                |                                      | Hatchling   | 4.61 $\pm$ 1.08                      | <b>8.81 <math>\pm</math> 3.43</b>      | <b>9.69 <math>\pm</math> 2.69</b>      |
| ALAS2-like     | Heme biosynthesis                    | Adult       | 9.68 $\pm$ 2.44                      | 7.53 $\pm$ 2.90                        | 8.72 $\pm$ 2.80                        |
|                |                                      | Hatchling   | 8.25 $\pm$ 2.00                      | <b>16.98 <math>\pm</math> 1.91</b>     | <b>19.00 <math>\pm</math> 2.14</b>     |
| METRNL         | Cold-Induced Thermogenic Response    | Adult       | 1.46 $\pm$ 1.21                      | 0.34 $\pm$ 0.19                        | 0.17 $\pm$ 0.07                        |
|                |                                      | Hatchling   | 0.98 $\pm$ 0.65                      | <b>4.42 <math>\pm</math> 3.22</b>      | <b>8.98 <math>\pm</math> 4.41</b>      |
| CHGB           | Hormone Activity                     | Adult       | 0.69 $\pm$ 0.11                      | 0.75 $\pm$ 0.17                        | 0.45 $\pm$ 0.16                        |
|                |                                      | Hatchling   | 0.98 $\pm$ 0.49                      | <b>3.97 <math>\pm</math> 1.69</b>      | <b>8.72 <math>\pm</math> 3.47</b>      |
| HBAA           | Oxygen Transport                     | Adult       | 602.61 $\pm$ 137.23                  | 381.69 $\pm$ 101.12                    | 428.41 $\pm$ 94.71                     |
|                |                                      | Hatchling   | 764.21 $\pm$ 184.15                  | <b>2132.55 <math>\pm</math> 425.10</b> | <b>1806.81 <math>\pm</math> 294.54</b> |
| HBAD           | Oxygen Transport                     | Adult       | 234.65 $\pm$ 22.75                   | 147.49 $\pm$ 32.77                     | 172.90 $\pm$ 51.25                     |
|                |                                      | Hatchling   | 266.32 $\pm$ 72.55                   | <b>751.79 <math>\pm</math> 166.64</b>  | <b>664.92 <math>\pm</math> 109.48</b>  |
| HBB            | Oxygen Transport                     | Adult       | 1124.02 $\pm$ 290.52                 | 710.12 $\pm$ 253.36                    | 833.93 $\pm$ 232.40                    |
|                |                                      | Hatchling   | 767.51 $\pm$ 247.70                  | <b>2067.65 <math>\pm</math> 592.31</b> | 1494.93 $\pm$ 370.84                   |
| HBB            | Oxygen Transport                     | Adult       | 0.22 $\pm$ 0.07                      | 0.39 $\pm$ 0.05                        | 0.35 $\pm$ 0.19                        |
|                |                                      | Hatchling   | <b>78.36 <math>\pm</math> 21.71</b>  | <b>166.39 <math>\pm</math> 42.48</b>   | <b>178.71 <math>\pm</math> 21.42</b>   |
| HBE1-like      | Oxygen Transport                     | Adult       | 1.00 $\pm$ 0.38                      | 1.28 $\pm$ 0.35                        | 0.37 $\pm$ 0.16                        |
|                |                                      | Hatchling   | <b>242.19 <math>\pm</math> 41.46</b> | <b>731.07 <math>\pm</math> 206.20</b>  | <b>599.84 <math>\pm</math> 155.55</b>  |
| SLPI-like      | Immune Response: Antibacterial       | Adult       | 20.29 $\pm$ 3.23                     | 15.73 $\pm$ 3.88                       | 33.31 $\pm$ 10.56                      |
|                |                                      | Hatchling   | <b>82.74 <math>\pm</math> 33.84</b>  | <b>157.16 <math>\pm</math> 25.76</b>   | <b>233.30 <math>\pm</math> 75.52</b>   |
| Ovomucoid-like | Signaling: Serine Protease Inhibitor | Adult       | 0.11 $\pm$ 0.11                      | 1.68 $\pm$ 0.60                        | 2.05 $\pm$ 1.14                        |
|                |                                      | Hatchling   | <b>14.42 <math>\pm</math> 6.88</b>   | <b>30.83 <math>\pm</math> 19.87</b>    | <b>29.64 <math>\pm</math> 12.42</b>    |
| VENT1B-like    | Transcription Factor                 | Adult       | 1.85 $\pm$ 0.85                      | 2.41 $\pm$ 1.60                        | 0.90 $\pm$ 0.29                        |
|                |                                      | Hatchling   | 1.39 $\pm$ 0.14                      | 3.45 $\pm$ 2.13                        | <b>5.75 <math>\pm</math> 2.95</b>      |

| Gene         | Classification                        | Development | Control Mean $\pm$ SEM FPKM       | Anoxia Mean $\pm$ SEM FPKM           | Recovery Mean $\pm$ SEM FPKM        |
|--------------|---------------------------------------|-------------|-----------------------------------|--------------------------------------|-------------------------------------|
| NCR3LG1-like | Immune Response                       | Adult       | 52.02 $\pm$ 7.55                  | 29.91 $\pm$ 11.51                    | 42.91 $\pm$ 14.80                   |
|              |                                       | Hatchling   | 58.33 $\pm$ 4.81                  | <b>132.51 <math>\pm</math> 39.03</b> | <b>101.44 <math>\pm</math> 9.51</b> |
| CCDC171      | Transcription Factor                  | Adult       | 1.99 $\pm$ 0.33                   | 2.70 $\pm$ 0.25                      | 1.91 $\pm$ 0.62                     |
|              |                                       | Hatchling   | <b>5.37 <math>\pm</math> 2.03</b> | <b>11.05 <math>\pm</math> 4.47</b>   | <b>8.60 <math>\pm</math> 1.95</b>   |
| CA1          | Respiration: Acid/Base Balance        | Adult       | 91.97 $\pm$ 18.36                 | 59.53 $\pm$ 23.59                    | 106.29 $\pm$ 45.87                  |
|              |                                       | Hatchling   | 59.73 $\pm$ 12.42                 | <b>163.76 <math>\pm</math> 26.40</b> | 92.79 $\pm$ 22.35                   |
| PPOX         | Heme biosynthesis                     | Adult       | 3.15 $\pm$ 0.63                   | 4.32 $\pm$ 0.77                      | 2.67 $\pm$ 0.85                     |
|              |                                       | Hatchling   | 5.56 $\pm$ 2.24                   | <b>23.39 <math>\pm</math> 17.17</b>  | 3.08 $\pm$ 0.56                     |
| CCL13-like   | Signaling: Chemokine                  | Adult       | 9.88 $\pm$ 1.09                   | 8.44 $\pm$ 3.38                      | 4.72 $\pm$ 0.68                     |
|              |                                       | Hatchling   | 15.74 $\pm$ 2.97                  | <b>35.39 <math>\pm</math> 5.75</b>   | <b>10.41 <math>\pm</math> 4.27</b>  |
| FAM184A      | Uncharacterized                       | Adult       | 13.18 $\pm$ 6.30                  | 9.76 $\pm$ 0.74                      | 8.28 $\pm$ 1.16                     |
|              |                                       | Hatchling   | 11.09 $\pm$ 6.42                  | <b>27.01 <math>\pm</math> 8.86</b>   | <b>19.31 <math>\pm</math> 8.47</b>  |
| LTB4R        | Signaling: Cardiac Muscle Contracting | Adult       | 1.38 $\pm$ 0.31                   | 0.98 $\pm$ 0.16                      | 1.58 $\pm$ 0.64                     |
|              |                                       | Hatchling   | 2.83 $\pm$ 0.74                   | <b>3.65 <math>\pm</math> 0.66</b>    | <b>7.42 <math>\pm</math> 0.87</b>   |
| ALAS2        | Heme biosynthesis                     | Adult       | 4.69 $\pm$ 1.16                   | 3.53 $\pm$ 0.96                      | 3.18 $\pm$ 0.83                     |
|              |                                       | Hatchling   | 4.89 $\pm$ 1.25                   | <b>9.09 <math>\pm</math> 1.10</b>    | <b>11.51 <math>\pm</math> 0.71</b>  |
| TF           | Ion Homeostasis: Iron                 | Adult       | 9.58 $\pm$ 1.87                   | 9.87 $\pm$ 1.65                      | 16.45 $\pm$ 3.77                    |
|              |                                       | Hatchling   | 16.47 $\pm$ 6.10                  | <b>32.83 <math>\pm</math> 4.13</b>   | <b>47.85 <math>\pm</math> 13.61</b> |
| DDN1-like    | Immune Response: Antibacterial        | Adult       | 2.26 $\pm$ 0.52                   | 0.98 $\pm$ 0.34                      | 3.32 $\pm$ 1.46                     |
|              |                                       | Hatchling   | 2.47 $\pm$ 0.75                   | <b>3.18 <math>\pm</math> 1.03</b>    | <b>16.04 <math>\pm</math> 12.87</b> |
| LOC101954115 | Immune Response: Chemokine Activity   | Adult       | 0.60 $\pm$ 0.19                   | 0.53 $\pm$ 0.15                      | 0.99 $\pm$ 0.41                     |
|              |                                       | Hatchling   | <b>2.98 <math>\pm</math> 1.28</b> | <b>4.32 <math>\pm</math> 0.54</b>    | <b>8.67 <math>\pm</math> 2.17</b>   |
| IL1R2        | Signaling: Cytokine Decoy Receptor    | Adult       | 0.64 $\pm$ 0.26                   | 0.80 $\pm$ 0.25                      | 1.01 $\pm$ 0.40                     |
|              |                                       | Hatchling   | <b>2.76 <math>\pm</math> 1.04</b> | <b>3.60 <math>\pm</math> 1.29</b>    | <b>8.49 <math>\pm</math> 2.82</b>   |
| CD59A-like   | Immune Response: Complement Cascade   | Adult       | 0.14 $\pm$ 0.14                   | 0.19 $\pm$ 0.19                      | 0.16 $\pm$ 0.07                     |
|              |                                       | Hatchling   | <b>2.77 <math>\pm</math> 1.16</b> | <b>2.18 <math>\pm</math> 1.78</b>    | <b>9.18 <math>\pm</math> 6.59</b>   |
| SLAMF9-like  | Immune Response                       | Adult       | 3.68 $\pm$ 1.09                   | 2.39 $\pm$ 1.19                      | 2.29 $\pm$ 0.61                     |
|              |                                       | Hatchling   | 4.38 $\pm$ 1.52                   | 4.50 $\pm$ 2.16                      | <b>11.01 <math>\pm</math> 5.73</b>  |
| SRGN         | Secretory Granule Organization        | Adult       | 16.11 $\pm$ 2.16                  | 18.79 $\pm$ 1.42                     | 22.69 $\pm$ 3.37                    |
|              |                                       | Hatchling   | 21.47 $\pm$ 3.17                  | 24.92 $\pm$ 3.01                     | <b>45.85 <math>\pm</math> 8.40</b>  |
| EDNRB        | Signaling: GCPR                       | Adult       | 6.85 $\pm$ 2.42                   | 8.80 $\pm$ 2.02                      | 4.69 $\pm$ 1.17                     |
|              |                                       | Hatchling   | 4.99 $\pm$ 0.66                   | 6.47 $\pm$ 0.98                      | <b>10.33 <math>\pm</math> 3.56</b>  |
| ATP5F1B-like | Respiratory electron transport        | Adult       | <b>5.65 <math>\pm</math> 3.87</b> | <b>3.02 <math>\pm</math> 0.82</b>    | 2.91 $\pm$ 0.53                     |
|              |                                       | Hatchling   | 1.83 $\pm$ 0.33                   | 1.72 $\pm$ 0.64                      | <b>7.26 <math>\pm</math> 3.10</b>   |

| Gene          | Classification                               | Development | Control Mean $\pm$ SEM FPKM           | Anoxia Mean $\pm$ SEM FPKM            | Recovery Mean $\pm$ SEM FPKM          |
|---------------|----------------------------------------------|-------------|---------------------------------------|---------------------------------------|---------------------------------------|
| AXL-like      | Signaling: ERK                               | Adult       | 12.60 $\pm$ 3.10                      | <b>23.60 <math>\pm</math> 4.91</b>    | 16.27 $\pm$ 4.75                      |
|               |                                              | Hatchling   | 13.28 $\pm$ 4.19                      | 10.52 $\pm$ 1.45                      | <b>33.12 <math>\pm</math> 12.49</b>   |
| BTN1A1-like   | Immune Response                              | Adult       | <b>3.89 <math>\pm</math> 1.83</b>     | 2.95 $\pm$ 0.91                       | 1.82 $\pm$ 0.74                       |
|               |                                              | Hatchling   | 1.00 $\pm$ 0.57                       | 4.02 $\pm$ 2.37                       | 2.22 $\pm$ 1.18                       |
| SFRP4         | Signaling: WNT                               | Adult       | 9.43 $\pm$ 5.85                       | <b>3.30 <math>\pm</math> 1.00</b>     | <b>3.03 <math>\pm</math> 1.60</b>     |
|               |                                              | Hatchling   | 3.73 $\pm$ 3.02                       | 0.47 $\pm$ 0.12                       | 1.17 $\pm$ 0.24                       |
| SIGLEC13      | Cell Structure: Adhesion                     | Adult       | <b>21.88 <math>\pm</math> 5.88</b>    | <b>11.52 <math>\pm</math> 6.42</b>    | <b>9.09 <math>\pm</math> 5.81</b>     |
|               |                                              | Hatchling   | 0.15 $\pm$ 0.06                       | 0.86 $\pm$ 0.64                       | 2.14 $\pm$ 0.81                       |
| ISG15         | Immune Response: ISGylation                  | Adult       | <b>101.51 <math>\pm</math> 67.08</b>  | <b>117.73 <math>\pm</math> 50.23</b>  | <b>47.87 <math>\pm</math> 19.78</b>   |
|               |                                              | Hatchling   | 11.71 $\pm$ 7.67                      | 3.85 $\pm$ 1.37                       | 4.92 $\pm$ 1.12                       |
| APOL4-like    | Lipid Transport                              | Adult       | <b>10.69 <math>\pm</math> 1.65</b>    | <b>11.49 <math>\pm</math> 5.69</b>    | <b>5.31 <math>\pm</math> 0.72</b>     |
|               |                                              | Hatchling   | 1.71 $\pm$ 0.45                       | 1.72 $\pm$ 0.45                       | 1.26 $\pm$ 0.47                       |
| SLC26A4       | Membrane Transport: Chloride/Iodide          | Adult       | <b>12.98 <math>\pm</math> 2.99</b>    | <b>9.64 <math>\pm</math> 2.88</b>     | <b>5.05 <math>\pm</math> 1.52</b>     |
|               |                                              | Hatchling   | 0.60 $\pm$ 0.14                       | 0.76 $\pm$ 0.35                       | 0.76 $\pm$ 0.25                       |
| MAMU-DRA-like | Immune Response                              | Adult       | <b>14.64 <math>\pm</math> 7.92</b>    | <b>8.10 <math>\pm</math> 2.03</b>     | <b>6.47 <math>\pm</math> 2.84</b>     |
|               |                                              | Hatchling   | 0.41 $\pm$ 0.20                       | 0.38 $\pm$ 0.16                       | 0.51 $\pm$ 0.29                       |
| MR1-like      | Immune Response: MAIT lymphocyte Development | Adult       | <b>18.84 <math>\pm</math> 6.34</b>    | <b>28.42 <math>\pm</math> 11.55</b>   | <b>9.30 <math>\pm</math> 7.10</b>     |
|               |                                              | Hatchling   | 1.52 $\pm$ 0.72                       | 2.33 $\pm$ 1.37                       | 1.30 $\pm$ 1.17                       |
| IFI6-like     | Apoptosis                                    | Adult       | <b>158.87 <math>\pm</math> 100.40</b> | <b>195.71 <math>\pm</math> 74.11</b>  | <b>50.64 <math>\pm</math> 29.23</b>   |
|               |                                              | Hatchling   | 31.97 $\pm$ 25.41                     | 31.81 $\pm$ 18.76                     | 22.19 $\pm$ 6.22                      |
| FGF10         | Growth Factor: Morphogenesis                 | Adult       | <b>5.86 <math>\pm</math> 1.85</b>     | <b>4.99 <math>\pm</math> 1.53</b>     | <b>2.49 <math>\pm</math> 0.95</b>     |
|               |                                              | Hatchling   | 1.05 $\pm$ 0.25                       | 1.34 $\pm$ 0.33                       | 0.66 $\pm$ 0.10                       |
| KRT19         | Cell Structure                               | Adult       | <b>41.60 <math>\pm</math> 13.79</b>   | <b>27.10 <math>\pm</math> 9.92</b>    | <b>24.50 <math>\pm</math> 6.59</b>    |
|               |                                              | Hatchling   | 9.81 $\pm$ 5.80                       | 6.58 $\pm$ 1.27                       | 3.99 $\pm$ 1.16                       |
| TCAP          | Contractility: Structural                    | Adult       | <b>881.36 <math>\pm</math> 231.78</b> | <b>582.37 <math>\pm</math> 373.15</b> | <b>431.76 <math>\pm</math> 268.04</b> |
|               |                                              | Hatchling   | 107.08 $\pm$ 41.88                    | 64.86 $\pm$ 25.59                     | 62.28 $\pm$ 17.87                     |
| ITGAD, ITGAM  | Signaling: ERK                               | Adult       | <b>5.82 <math>\pm</math> 3.01</b>     | <b>4.55 <math>\pm</math> 1.84</b>     | <b>1.52 <math>\pm</math> 0.85</b>     |
|               |                                              | Hatchling   | 0.26 $\pm$ 0.06                       | 0.20 $\pm$ 0.07                       | 0.46 $\pm$ 0.35                       |
| GFRA3         | Signaling: GDNF Receptor                     | Adult       | <b>222.97 <math>\pm</math> 42.62</b>  | <b>232.62 <math>\pm</math> 96.65</b>  | <b>86.74 <math>\pm</math> 23.92</b>   |
|               |                                              | Hatchling   | 33.47 $\pm$ 13.47                     | 26.71 $\pm$ 8.67                      | 6.86 $\pm$ 0.85                       |
| LOC101932961  | Uncharacterized                              | Adult       | <b>4.42 <math>\pm</math> 0.85</b>     | <b>5.03 <math>\pm</math> 2.56</b>     | <b>2.20 <math>\pm</math> 0.17</b>     |
|               |                                              | Hatchling   | 0.91 $\pm$ 0.20                       | 0.95 $\pm$ 0.23                       | 0.74 $\pm$ 0.12                       |
| TMEM52        | Uncharacterized                              | Adult       | <b>6.34 <math>\pm</math> 3.29</b>     | <b>3.65 <math>\pm</math> 0.61</b>     | <b>2.65 <math>\pm</math> 0.59</b>     |
|               |                                              | Hatchling   | 1.65 $\pm$ 0.32                       | 1.68 $\pm$ 0.45                       | 1.18 $\pm$ 0.14                       |

| Gene         | Classification                                  | Development | Control Mean $\pm$ SEM FPKM           | Anoxia Mean $\pm$ SEM FPKM          | Recovery Mean $\pm$ SEM FPKM        |
|--------------|-------------------------------------------------|-------------|---------------------------------------|-------------------------------------|-------------------------------------|
| FCN3         | Immune Response: Complement Cascade             | Adult       | <b>70.02 <math>\pm</math> 17.68</b>   | <b>33.13 <math>\pm</math> 8.24</b>  | <b>38.63 <math>\pm</math> 7.30</b>  |
|              |                                                 | Hatchling   | 23.64 $\pm$ 5.37                      | 8.34 $\pm$ 1.60                     | 13.70 $\pm$ 3.74                    |
| APOL4-like   | Lipid Transport                                 | Adult       | <b>6.90 <math>\pm</math> 0.88</b>     | <b>2.55 <math>\pm</math> 1.72</b>   | <b>4.47 <math>\pm</math> 0.42</b>   |
|              |                                                 | Hatchling   | 0.90 $\pm$ 0.31                       | 1.28 $\pm$ 0.71                     | 0.90 $\pm$ 0.30                     |
| CDNF         | Neurotrophic Factor                             | Adult       | <b>6.01 <math>\pm</math> 0.69</b>     | <b>2.81 <math>\pm</math> 0.64</b>   | <b>4.32 <math>\pm</math> 0.87</b>   |
|              |                                                 | Hatchling   | 1.52 $\pm$ 0.49                       | 1.28 $\pm$ 0.50                     | 1.68 $\pm$ 0.25                     |
| SPP1         | Immune Response: Cytokine Activity              | Adult       | 29.53 $\pm$ 15.61                     | <b>14.21 <math>\pm</math> 0.87</b>  | <b>18.58 <math>\pm</math> 7.20</b>  |
|              |                                                 | Hatchling   | 17.69 $\pm$ 7.44                      | 3.67 $\pm$ 1.41                     | 2.32 $\pm$ 1.00                     |
| TRIM41-like  | Post Translational Modification: Ubiquitination | Adult       | <b>64.89 <math>\pm</math> 9.26</b>    | <b>16.06 <math>\pm</math> 8.98</b>  | <b>16.42 <math>\pm</math> 6.83</b>  |
|              |                                                 | Hatchling   | 2.13 $\pm$ 0.31                       | 2.58 $\pm$ 1.03                     | 2.16 $\pm$ 1.35                     |
| LOC101941125 | Peptide Digestion                               | Adult       | <b>6.38 <math>\pm</math> 0.51</b>     | <b>6.28 <math>\pm</math> 0.98</b>   | 2.91 $\pm$ 0.53                     |
|              |                                                 | Hatchling   | 2.58 $\pm$ 0.86                       | 1.55 $\pm$ 0.88                     | 1.68 $\pm$ 0.49                     |
| PINLYP-like  | Phospholipase Inhibition                        | Adult       | <b>305.18 <math>\pm</math> 219.53</b> | <b>77.02 <math>\pm</math> 47.03</b> | 10.85 $\pm$ 4.48                    |
|              |                                                 | Hatchling   | 15.24 $\pm$ 13.91                     | 36.09 $\pm$ 28.52                   | <b>28.28 <math>\pm</math> 14.58</b> |
| TRIM27-like  | Post Translational Modification: Ubiquitination | Adult       | <b>7.70 <math>\pm</math> 3.21</b>     | 2.46 $\pm$ 2.46                     | <b>5.84 <math>\pm</math> 1.95</b>   |
|              |                                                 | Hatchling   | 0.80 $\pm$ 0.51                       | 1.67 $\pm$ 0.75                     | 1.32 $\pm$ 0.75                     |
| SEMA7A       | Signaling: Protein Kinase                       | Adult       | <b>6.91 <math>\pm</math> 1.64</b>     | 3.36 $\pm$ 0.37                     | <b>6.81 <math>\pm</math> 1.19</b>   |
|              |                                                 | Hatchling   | 3.23 $\pm$ 0.70                       | 3.08 $\pm$ 0.49                     | 2.89 $\pm$ 0.39                     |
| H2-EB1-like  | Immune Response                                 | Adult       | <b>21.04 <math>\pm</math> 9.95</b>    | 0.05 $\pm$ 0.02                     | <b>8.47 <math>\pm</math> 8.39</b>   |
|              |                                                 | Hatchling   | 0.03 $\pm$ 0.02                       | 0.03 $\pm$ 0.03                     | 0.02 $\pm$ 0.01                     |
| RTRAF        | Translation                                     | Adult       | 17.34 $\pm$ 7.86                      | 4.20 $\pm$ 4.20                     | <b>15.08 <math>\pm</math> 5.37</b>  |
|              |                                                 | Hatchling   | 15.23 $\pm$ 5.23                      | 5.45 $\pm$ 5.33                     | 4.26 $\pm$ 4.26                     |
| LOC101946291 | Binding: Carbohydrate                           | Adult       | <b>65.09 <math>\pm</math> 24.55</b>   | 27.24 $\pm$ 6.61                    | 24.71 $\pm$ 4.31                    |
|              |                                                 | Hatchling   | 28.87 $\pm$ 16.98                     | 35.64 $\pm$ 16.13                   | 38.66 $\pm$ 12.27                   |
| CYP26B1      | Binding: Heme                                   | Adult       | <b>19.66 <math>\pm</math> 5.20</b>    | 10.44 $\pm$ 4.26                    | 8.62 $\pm$ 3.25                     |
|              |                                                 | Hatchling   | 5.75 $\pm$ 0.86                       | 6.42 $\pm$ 2.25                     | 6.63 $\pm$ 0.89                     |
| ARHGAP6      | Contractility: Actin Binding                    | Adult       | <b>27.40 <math>\pm</math> 21.52</b>   | 6.22 $\pm$ 0.36                     | 6.20 $\pm$ 0.66                     |
|              |                                                 | Hatchling   | 7.70 $\pm$ 0.68                       | 8.65 $\pm$ 1.59                     | 9.41 $\pm$ 0.49                     |
| COL20A1      | Extracellular Matrix                            | Adult       | <b>2.85 <math>\pm</math> 1.00</b>     | 2.29 $\pm$ 0.40                     | 1.39 $\pm$ 0.41                     |
|              |                                                 | Hatchling   | 0.79 $\pm$ 0.20                       | 2.62 $\pm$ 0.90                     | 2.60 $\pm$ 0.74                     |
| TRIM15-like  | Immune Response                                 | Adult       | <b>6.26 <math>\pm</math> 2.78</b>     | 1.51 $\pm$ 0.83                     | 3.86 $\pm$ 1.04                     |
|              |                                                 | Hatchling   | 1.98 $\pm$ 0.85                       | 1.28 $\pm$ 0.64                     | 0.24 $\pm$ 0.15                     |
| FAM19A3-like | Immune Response: Neurokine activity             | Adult       | <b>12.63 <math>\pm</math> 3.73</b>    | 4.16 $\pm$ 1.31                     | 4.90 $\pm$ 1.59                     |
|              |                                                 | Hatchling   | 6.11 $\pm$ 1.50                       | 3.76 $\pm$ 2.18                     | 2.92 $\pm$ 1.73                     |



| Gene         | Classification                                               | Development | Control Mean $\pm$ SEM FPKM         | Anoxia Mean $\pm$ SEM FPKM | Recovery Mean $\pm$ SEM FPKM      |
|--------------|--------------------------------------------------------------|-------------|-------------------------------------|----------------------------|-----------------------------------|
| TIMP1        | Post Translational Modification: Metalloproteinase Inhibitor | Adult       | <b>42.70 <math>\pm</math> 12.21</b> | 13.91 $\pm$ 4.37           | 16.44 $\pm$ 4.35                  |
|              |                                                              | Hatchling   | 14.21 $\pm$ 2.62                    | 19.84 $\pm$ 4.55           | 11.85 $\pm$ 4.44                  |
| NNMT-like    | Nicotinamide N-methylation                                   | Adult       | <b>16.86 <math>\pm</math> 2.47</b>  | 11.66 $\pm$ 3.73           | 7.29 $\pm$ 0.64                   |
|              |                                                              | Hatchling   | 4.50 $\pm$ 0.65                     | 14.38 $\pm$ 4.10           | 4.44 $\pm$ 0.38                   |
| AHR-like     | Transcription Factor                                         | Adult       | <b>8.83 <math>\pm</math> 3.86</b>   | 2.12 $\pm$ 0.77            | 4.90 $\pm$ 3.92                   |
|              |                                                              | Hatchling   | 2.61 $\pm$ 1.15                     | 1.85 $\pm$ 0.56            | 3.14 $\pm$ 1.43                   |
| SIRPB1-like  | Signaling: Protein Kinase                                    | Adult       | <b>8.94 <math>\pm</math> 4.93</b>   | 2.00 $\pm$ 0.61            | 3.29 $\pm$ 1.32                   |
|              |                                                              | Hatchling   | 3.03 $\pm$ 1.44                     | 3.92 $\pm$ 1.46            | 4.09 $\pm$ 2.04                   |
| CLEC2D-like  | Signaling: Cell Surface Receptor                             | Adult       | 7.08 $\pm$ 1.91                     | 2.62 $\pm$ 0.90            | 3.42 $\pm$ 0.92                   |
|              |                                                              | Hatchling   | 3.99 $\pm$ 2.11                     | 3.56 $\pm$ 1.61            | 3.78 $\pm$ 1.30                   |
| CSF2RB       | Immune Response                                              | Adult       | 5.56 $\pm$ 1.85                     | 2.07 $\pm$ 0.79            | 1.90 $\pm$ 0.24                   |
|              |                                                              | Hatchling   | 5.12 $\pm$ 1.17                     | 2.68 $\pm$ 0.58            | 2.97 $\pm$ 0.35                   |
| CEMIP2-like  | Hyaluronan catabolism, VEGF signaling regulation             | Adult       | 22.88 $\pm$ 8.70                    | 8.38 $\pm$ 3.52            | 6.56 $\pm$ 2.77                   |
|              |                                                              | Hatchling   | 14.30 $\pm$ 3.75                    | 11.47 $\pm$ 1.03           | 8.74 $\pm$ 1.40                   |
| DDC          | Dopamine Synthesis                                           | Adult       | 4.31 $\pm$ 1.69                     | 1.71 $\pm$ 0.72            | 2.04 $\pm$ 0.35                   |
|              |                                                              | Hatchling   | 2.57 $\pm$ 0.29                     | 2.59 $\pm$ 0.53            | 1.62 $\pm$ 0.53                   |
| TSPAN7       | Immune Response                                              | Adult       | 27.57 $\pm$ 6.39                    | 13.13 $\pm$ 2.55           | 13.17 $\pm$ 3.43                  |
|              |                                                              | Hatchling   | 17.76 $\pm$ 1.12                    | 17.72 $\pm$ 2.27           | 15.49 $\pm$ 1.89                  |
| ABO          | Immune Response: glycosylation                               | Adult       | 12.36 $\pm$ 2.71                    | 4.28 $\pm$ 1.44            | 5.31 $\pm$ 1.17                   |
|              |                                                              | Hatchling   | 7.60 $\pm$ 1.30                     | 5.25 $\pm$ 1.54            | 6.03 $\pm$ 0.78                   |
| STEAP4       | Ion Homeostasis: Iron                                        | Adult       | 11.35 $\pm$ 5.73                    | 4.40 $\pm$ 0.53            | 3.56 $\pm$ 0.79                   |
|              |                                                              | Hatchling   | 6.79 $\pm$ 1.47                     | 4.25 $\pm$ 0.62            | 4.24 $\pm$ 0.92                   |
| SOCS1        | Immune Response: Cytokine Activity                           | Adult       | 6.56 $\pm$ 2.43                     | 2.51 $\pm$ 0.51            | <b>3.13 <math>\pm</math> 0.96</b> |
|              |                                                              | Hatchling   | 4.84 $\pm$ 1.44                     | 2.21 $\pm$ 0.49            | 1.27 $\pm$ 0.22                   |
| BTG2         | RNA modification: cell cycle regulation                      | Adult       | 38.14 $\pm$ 8.22                    | 10.97 $\pm$ 1.97           | 18.91 $\pm$ 4.32                  |
|              |                                                              | Hatchling   | 38.77 $\pm$ 6.13                    | 16.23 $\pm$ 2.84           | 15.21 $\pm$ 2.62                  |
| CISH         | Signaling: Cytokine Inhibitor                                | Adult       | 7.49 $\pm$ 1.65                     | 2.68 $\pm$ 0.77            | 6.18 $\pm$ 2.15                   |
|              |                                                              | Hatchling   | 9.97 $\pm$ 1.59                     | 5.22 $\pm$ 0.69            | 4.53 $\pm$ 0.74                   |
| ANKRD1       | Transcription Factor: cardiac                                | Adult       | 13.07 $\pm$ 6.69                    | 4.68 $\pm$ 2.05            | 11.41 $\pm$ 5.17                  |
|              |                                                              | Hatchling   | 15.50 $\pm$ 3.11                    | 6.80 $\pm$ 1.76            | 13.21 $\pm$ 5.31                  |
| LOC101931610 | Uncharacterized                                              | Adult       | 3.74 $\pm$ 0.56                     | 1.71 $\pm$ 0.27            | 2.25 $\pm$ 0.14                   |
|              |                                                              | Hatchling   | 2.69 $\pm$ 0.47                     | 2.17 $\pm$ 0.25            | 2.11 $\pm$ 0.38                   |
| PLK2         | Cell Cycle: G1/S Phase Transition                            | Adult       | 29.99 $\pm$ 8.13                    | 14.95 $\pm$ 2.25           | 21.65 $\pm$ 7.90                  |
|              |                                                              | Hatchling   | 16.53 $\pm$ 3.13                    | 20.81 $\pm$ 3.97           | 19.36 $\pm$ 2.34                  |

| Gene        | Classification                                 | Development | Control Mean $\pm$ SEM FPKM | Anoxia Mean $\pm$ SEM FPKM | Recovery Mean $\pm$ SEM FPKM |
|-------------|------------------------------------------------|-------------|-----------------------------|----------------------------|------------------------------|
| MS4A1       | Immune Response: B-Cell Development            | Adult       | 28.05 $\pm$ 5.37            | 11.31 $\pm$ 0.64           | 15.82 $\pm$ 2.02             |
|             |                                                | Hatchling   | 15.48 $\pm$ 4.45            | 19.89 $\pm$ 4.12           | 14.88 $\pm$ 3.16             |
| RAPSN       | Neuromuscular Junction                         | Adult       | 4.48 $\pm$ 0.33             | 2.24 $\pm$ 0.34            | 3.36 $\pm$ 0.71              |
|             |                                                | Hatchling   | 3.58 $\pm$ 0.17             | 3.53 $\pm$ 0.59            | 4.10 $\pm$ 0.62              |
| H2AFJ-like  | Nucleosome                                     | Adult       | 128.13 $\pm$ 41.21          | 54.20 $\pm$ 10.14          | 71.18 $\pm$ 17.58            |
|             |                                                | Hatchling   | 88.91 $\pm$ 33.90           | 75.92 $\pm$ 23.63          | 87.23 $\pm$ 20.35            |
| FAR2        | Fatty Acyl-CoA Reductase Activity              | Adult       | 7.23 $\pm$ 0.88             | 4.13 $\pm$ 1.08            | 3.45 $\pm$ 0.89              |
|             |                                                | Hatchling   | 4.89 $\pm$ 1.05             | 4.27 $\pm$ 0.46            | 4.07 $\pm$ 0.16              |
| MIEN1-like  | Cell Migration                                 | Adult       | 3.57 $\pm$ 1.69             | 2.69 $\pm$ 0.65            | 1.38 $\pm$ 0.37              |
|             |                                                | Hatchling   | 1.90 $\pm$ 0.69             | 2.38 $\pm$ 0.76            | 2.12 $\pm$ 0.33              |
| CEMIP       | Hyaluronan catabolism                          | Adult       | 9.13 $\pm$ 3.90             | 5.72 $\pm$ 1.86            | 3.92 $\pm$ 1.54              |
|             |                                                | Hatchling   | 5.33 $\pm$ 1.12             | 4.38 $\pm$ 0.67            | 5.82 $\pm$ 1.11              |
| NLRP1B-like | Immune Response: Cytokine Activity             | Adult       | 3.51 $\pm$ 0.40             | 2.39 $\pm$ 0.81            | 1.64 $\pm$ 0.26              |
|             |                                                | Hatchling   | 1.92 $\pm$ 0.26             | 1.97 $\pm$ 0.21            | 1.93 $\pm$ 0.33              |
| SLC20A2     | Membrane Transport: Sodium-phosphate Symporter | Adult       | 17.75 $\pm$ 3.92            | 10.72 $\pm$ 1.92           | 8.85 $\pm$ 0.60              |
|             |                                                | Hatchling   | 11.36 $\pm$ 1.33            | 9.42 $\pm$ 0.43            | 8.67 $\pm$ 0.70              |
| CAMP        | Immune Response: Antibacterial                 | Adult       | 21.20 $\pm$ 6.11            | 18.35 $\pm$ 6.92           | 29.00 $\pm$ 5.71             |
|             |                                                | Hatchling   | 15.65 $\pm$ 3.16            | 22.48 $\pm$ 3.95           | 43.07 $\pm$ 9.86             |
| TMC5        | Membrane Transport: Iron Conductance           | Adult       | 9.52 $\pm$ 2.33             | 8.11 $\pm$ 2.45            | 7.42 $\pm$ 1.02              |
|             |                                                | Hatchling   | 5.19 $\pm$ 1.57             | 11.29 $\pm$ 3.06           | 8.46 $\pm$ 1.61              |

Significant increases from control FPKM ( $\log_2$  fold-change  $\geq 1$ ) are highlighted in green while significant decreases from control FPKM ( $\log_2$  fold-change  $\leq -1$ ) are highlighted in purple. Genes that are also significant different between development stages during anoxia or recovery ( $\log_2$  fold-change  $\geq 1$  or  $\leq -1$ ) are highlighted in yellow.
